# Supplementary material for: VanadiumV(salen) catalysed synthesis of oxazolidinones from epoxides and isocyanates
Source: Royal Society of Chemistry journal article supplement (doi:10.1039/c4ra04427d), 2014-01-01

## SUPPORTING INFORMATION FOR:

# Vanadium<sup>V</sup>(salen) catalysed synthesis of oxazolidinones from epoxides and isocyanates

Christopher Beattie<sup>b</sup> and Michael North\*<sup>a,b</sup>

a Green Chemistry Centre of Excellence, Department of Chemistry, The University of York, Heslington, York, YO10 5DD, UK

b School of Chemistry, Bedson Building, Newcastle University, Newcastle upon Tyne, NE1 7RU, UK.

### Contents

|                                                                                             |     |
|---------------------------------------------------------------------------------------------|-----|
| <sup>1</sup> H NMR spectrum of 3,4-diphenyloxazolidin-2-one <b>4a</b>                       | p2  |
| <sup>1</sup> H NMR spectrum of 3-phenyl-5-chloromethyloxazolidin-2-one <b>3b</b>            | p3  |
| <sup>1</sup> H NMR spectrum of 3-phenyl-5-butyloxazolidin-2-one <b>3c</b>                   | p4  |
| <sup>1</sup> H NMR spectrum of 3-phenyl-5-phenoxy-methyloxazolidin-2-one <b>3d</b>          | p5  |
| <sup>1</sup> H NMR spectrum of 3-phenyl-5-methyloxazolidin-2-one <b>3e</b>                  | p6  |
| <sup>1</sup> H NMR spectrum of 3-phenyl-5-ethyloxazolidin-2-one <b>3f</b>                   | p7  |
| <sup>1</sup> H NMR spectrum of 3-phenyl-5-octyloxazolidin-2-one <b>3g</b>                   | p8  |
| <sup>1</sup> H NMR spectrum of 3-phenyl-4-hydroxymethyloxazolidin-2-one <b>4h</b>           | p9  |
| <sup>1</sup> H NMR spectrum of 3-(4-fluorophenyl)-4-phenyloxazolidin-2-one <b>4i</b>        | p10 |
| <sup>1</sup> H NMR spectrum of 3-(4-chlorophenyl)-4-phenyloxazolidin-2-one <b>4j</b>        | p11 |
| <sup>1</sup> H NMR spectrum of 3-(4-bromophenyl)-4-phenyloxazolidin-2-one <b>4k</b>         | p12 |
| <sup>1</sup> H NMR spectrum of 3-(4-methoxyphenyl)-4-phenyloxazolidin-2-one <b>4l</b>       | p13 |
| <sup>1</sup> H NMR spectrum of 3-(4-methylphenyl)-4-phenyloxazolidin-2-one <b>4m</b>        | p14 |
| <sup>1</sup> H NMR spectrum of 3-(4-fluorophenyl)-5-chloromethyloxazolidin-2-one <b>3n</b>  | p15 |
| <sup>1</sup> H NMR spectrum of 3-(4-chlorophenyl)-5-chloromethyloxazolidin-2-one <b>3o</b>  | p16 |
| <sup>1</sup> H NMR spectrum of 3-(4-bromophenyl)-5-chloromethyloxazolidin-2-one <b>3p</b>   | p17 |
| <sup>1</sup> H NMR spectrum of 3-(4-methoxyphenyl)-5-chloromethyloxazolidin-2-one <b>3q</b> | p18 |
| <sup>1</sup> H NMR spectrum of 3-(4-methylphenyl)-5-chloromethyloxazolidin-2-one <b>3r</b>  | p19 |

<sup>1</sup>H NMR spectrum of 3,4-diphenyloxazolidin-2-one **4a**

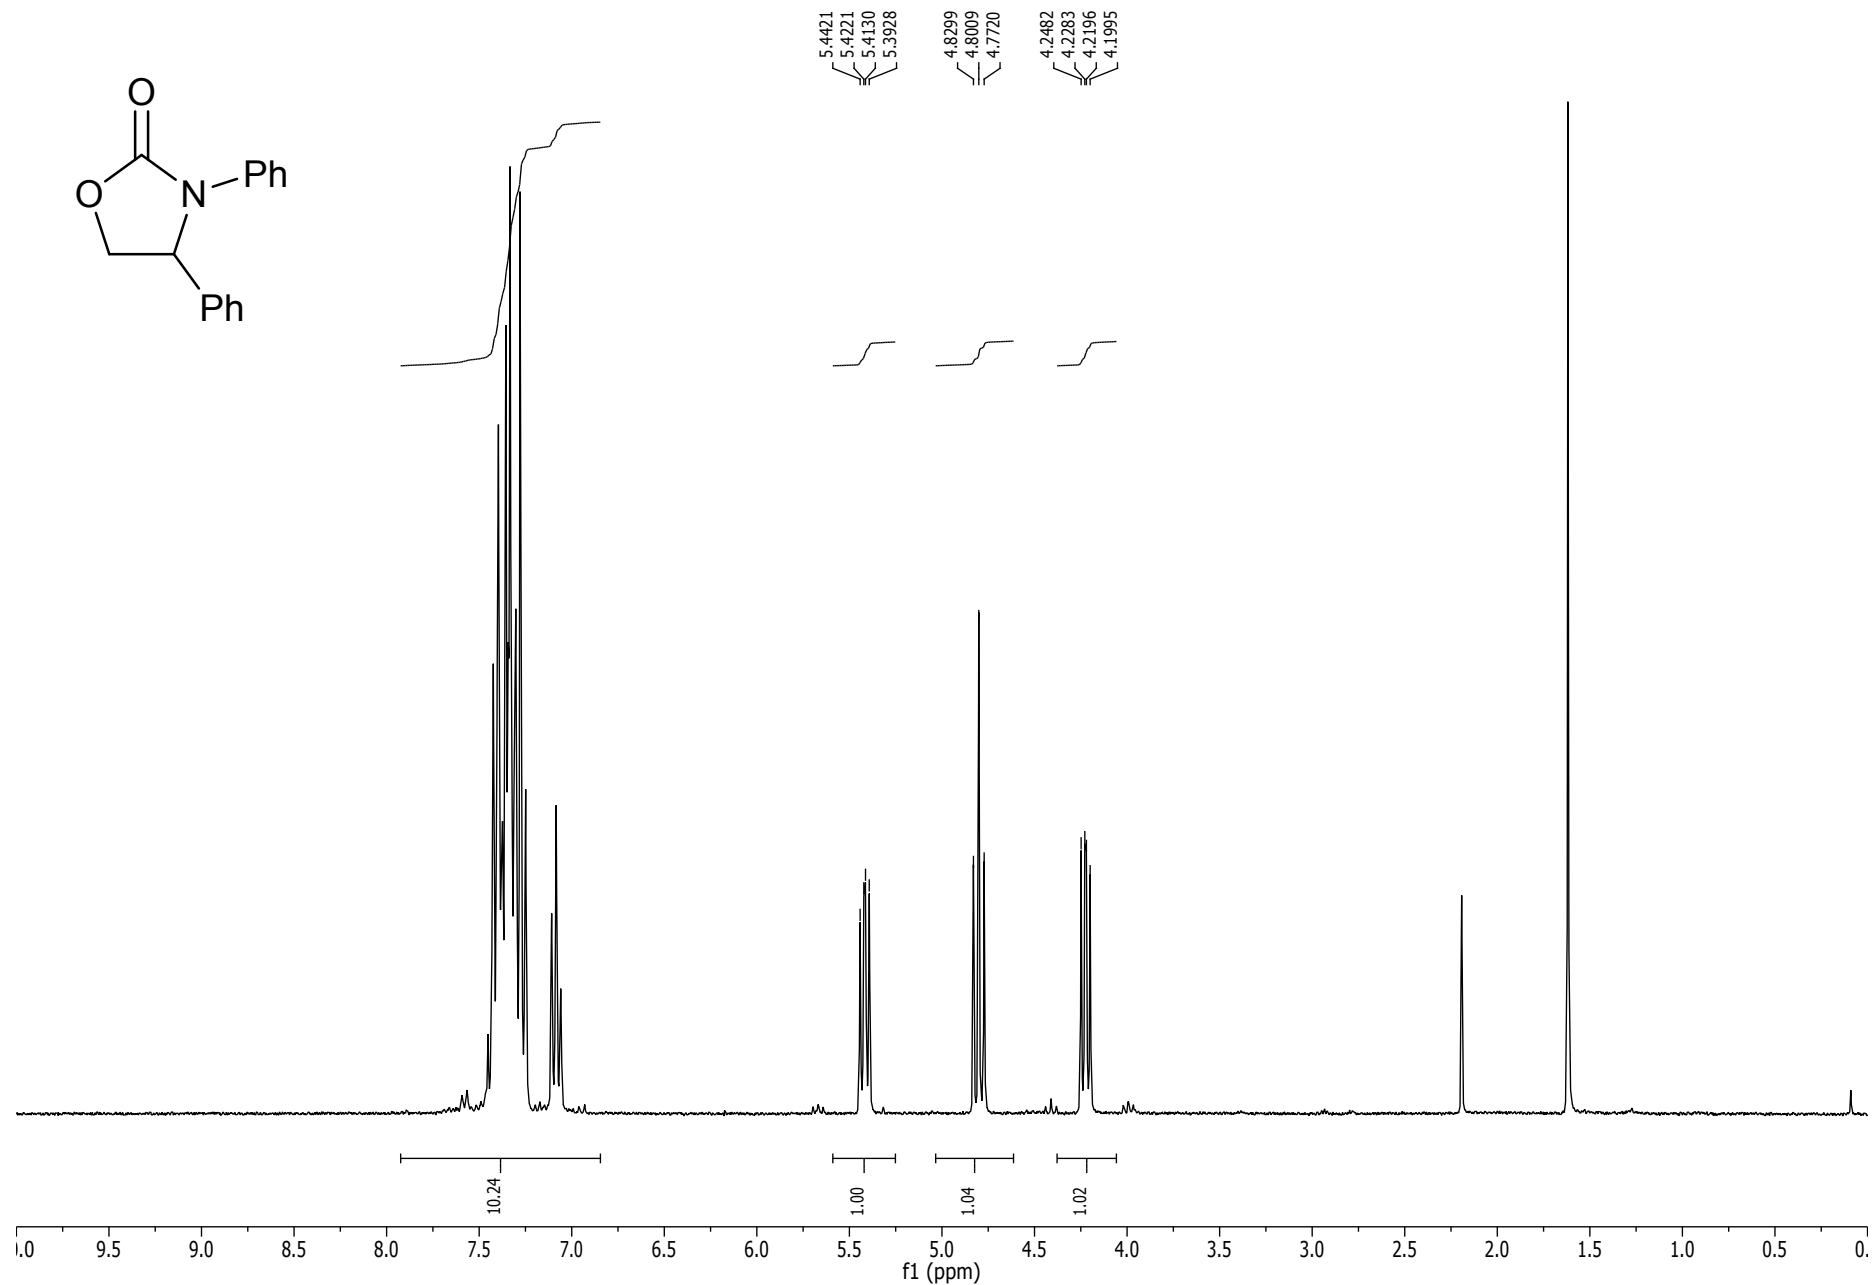

<sup>1</sup>H NMR spectrum of 3-phenyl-5-chloromethyloxazolidin-2-one **3b**

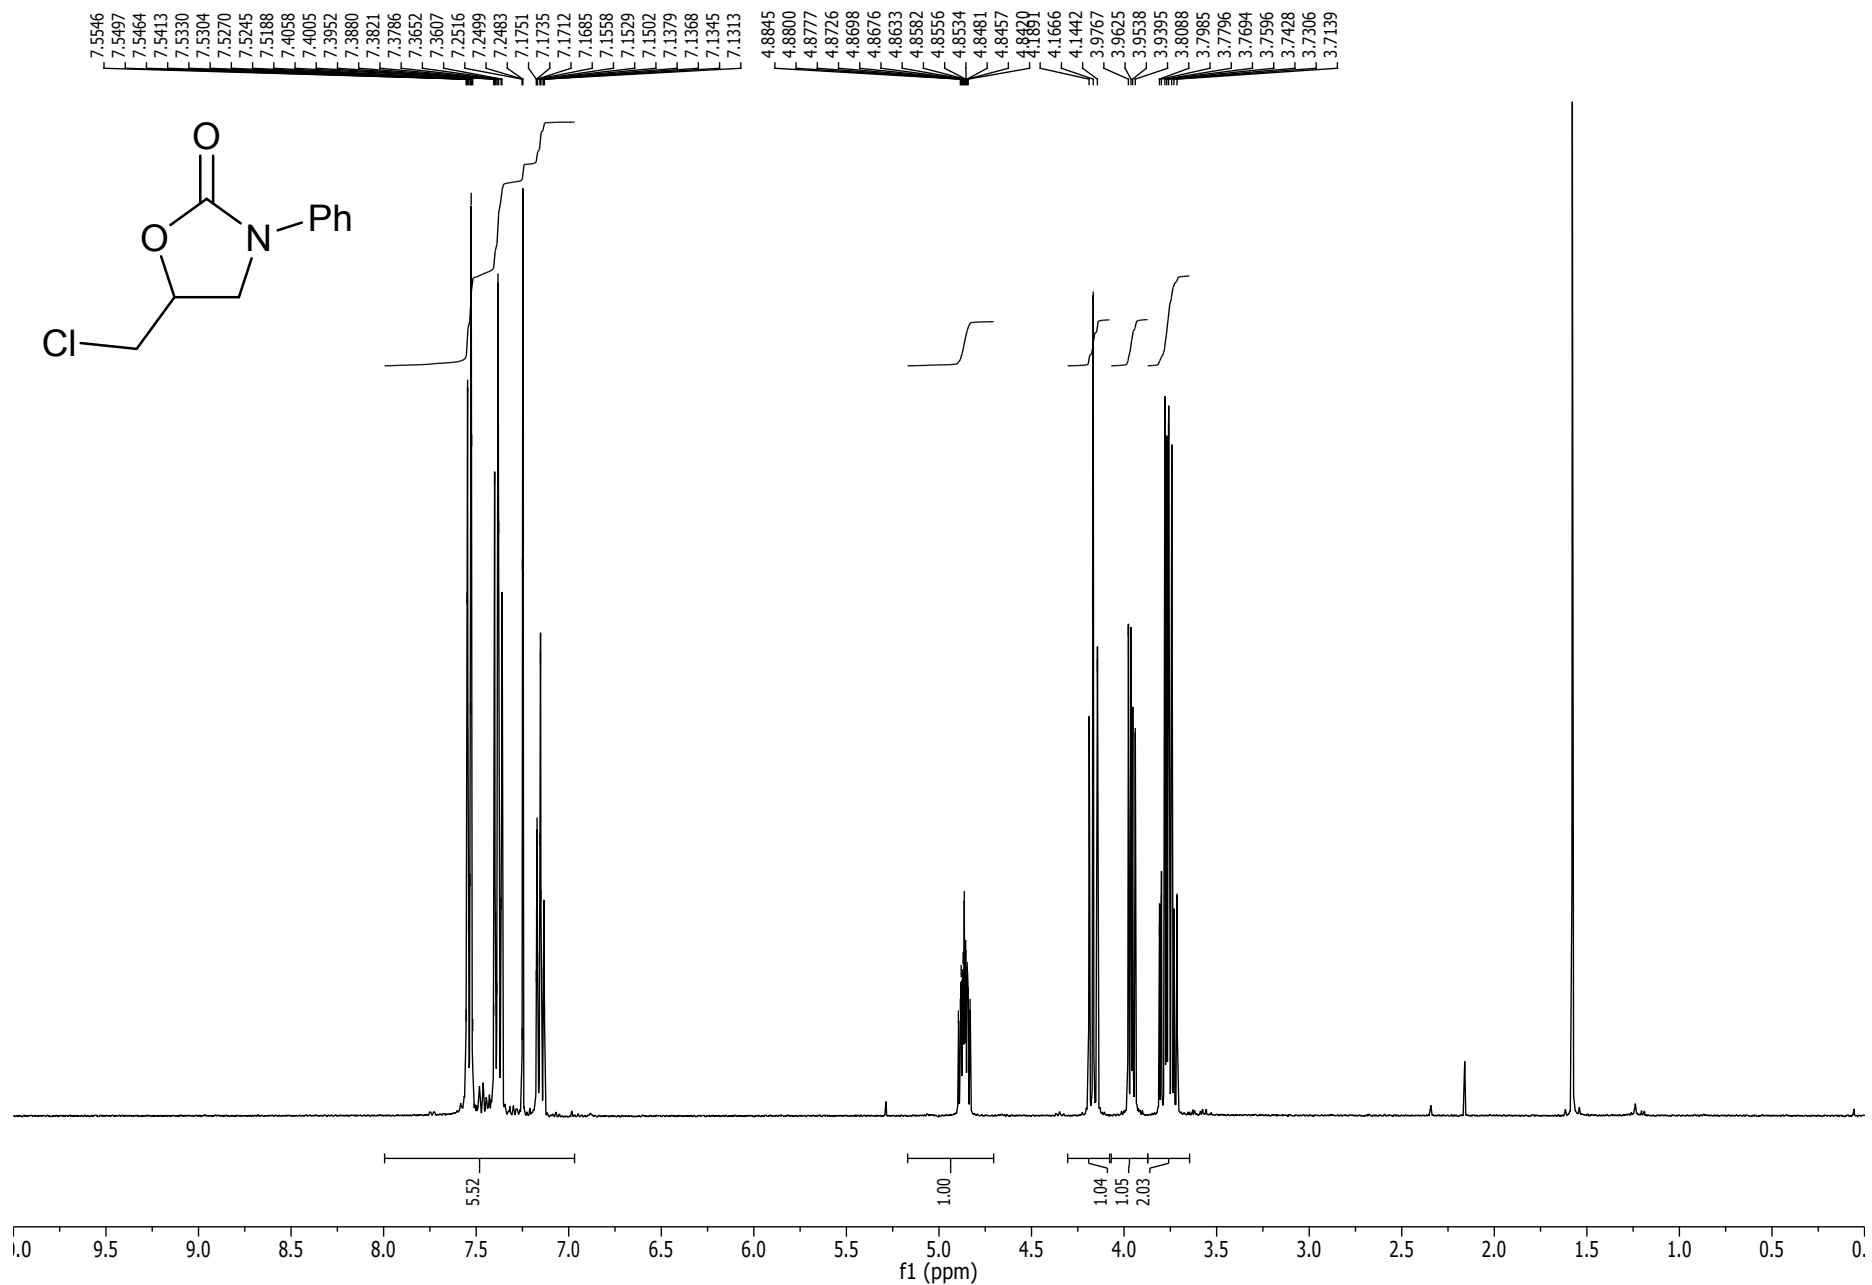

<sup>1</sup>H NMR spectrum of 3-phenyl-5-butylloxazolidin-2-one **3c**

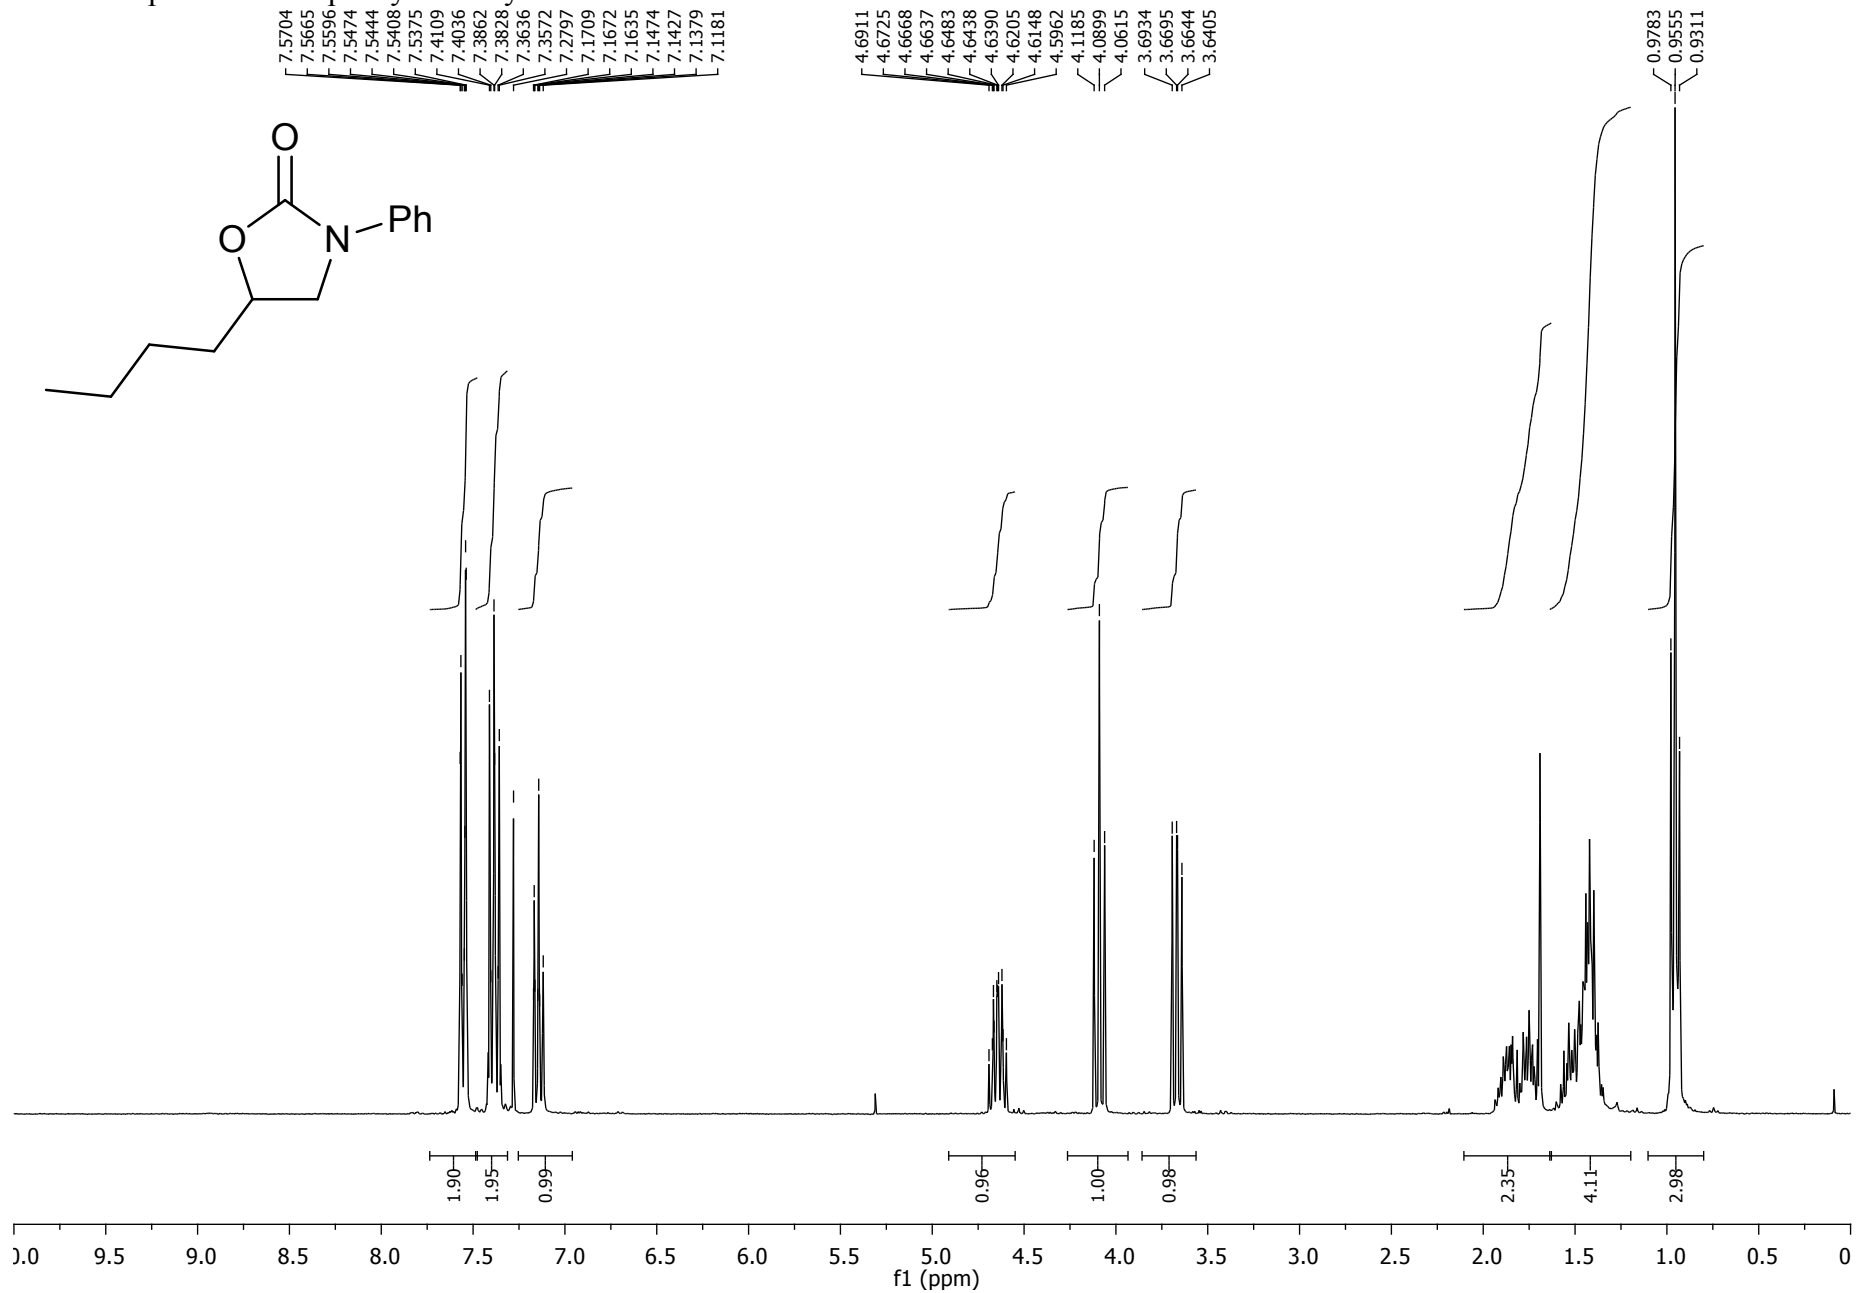

<sup>1</sup>H NMR spectrum of compound 3-phenyl-5-phenoxyoxazolidin-2-one **3d**

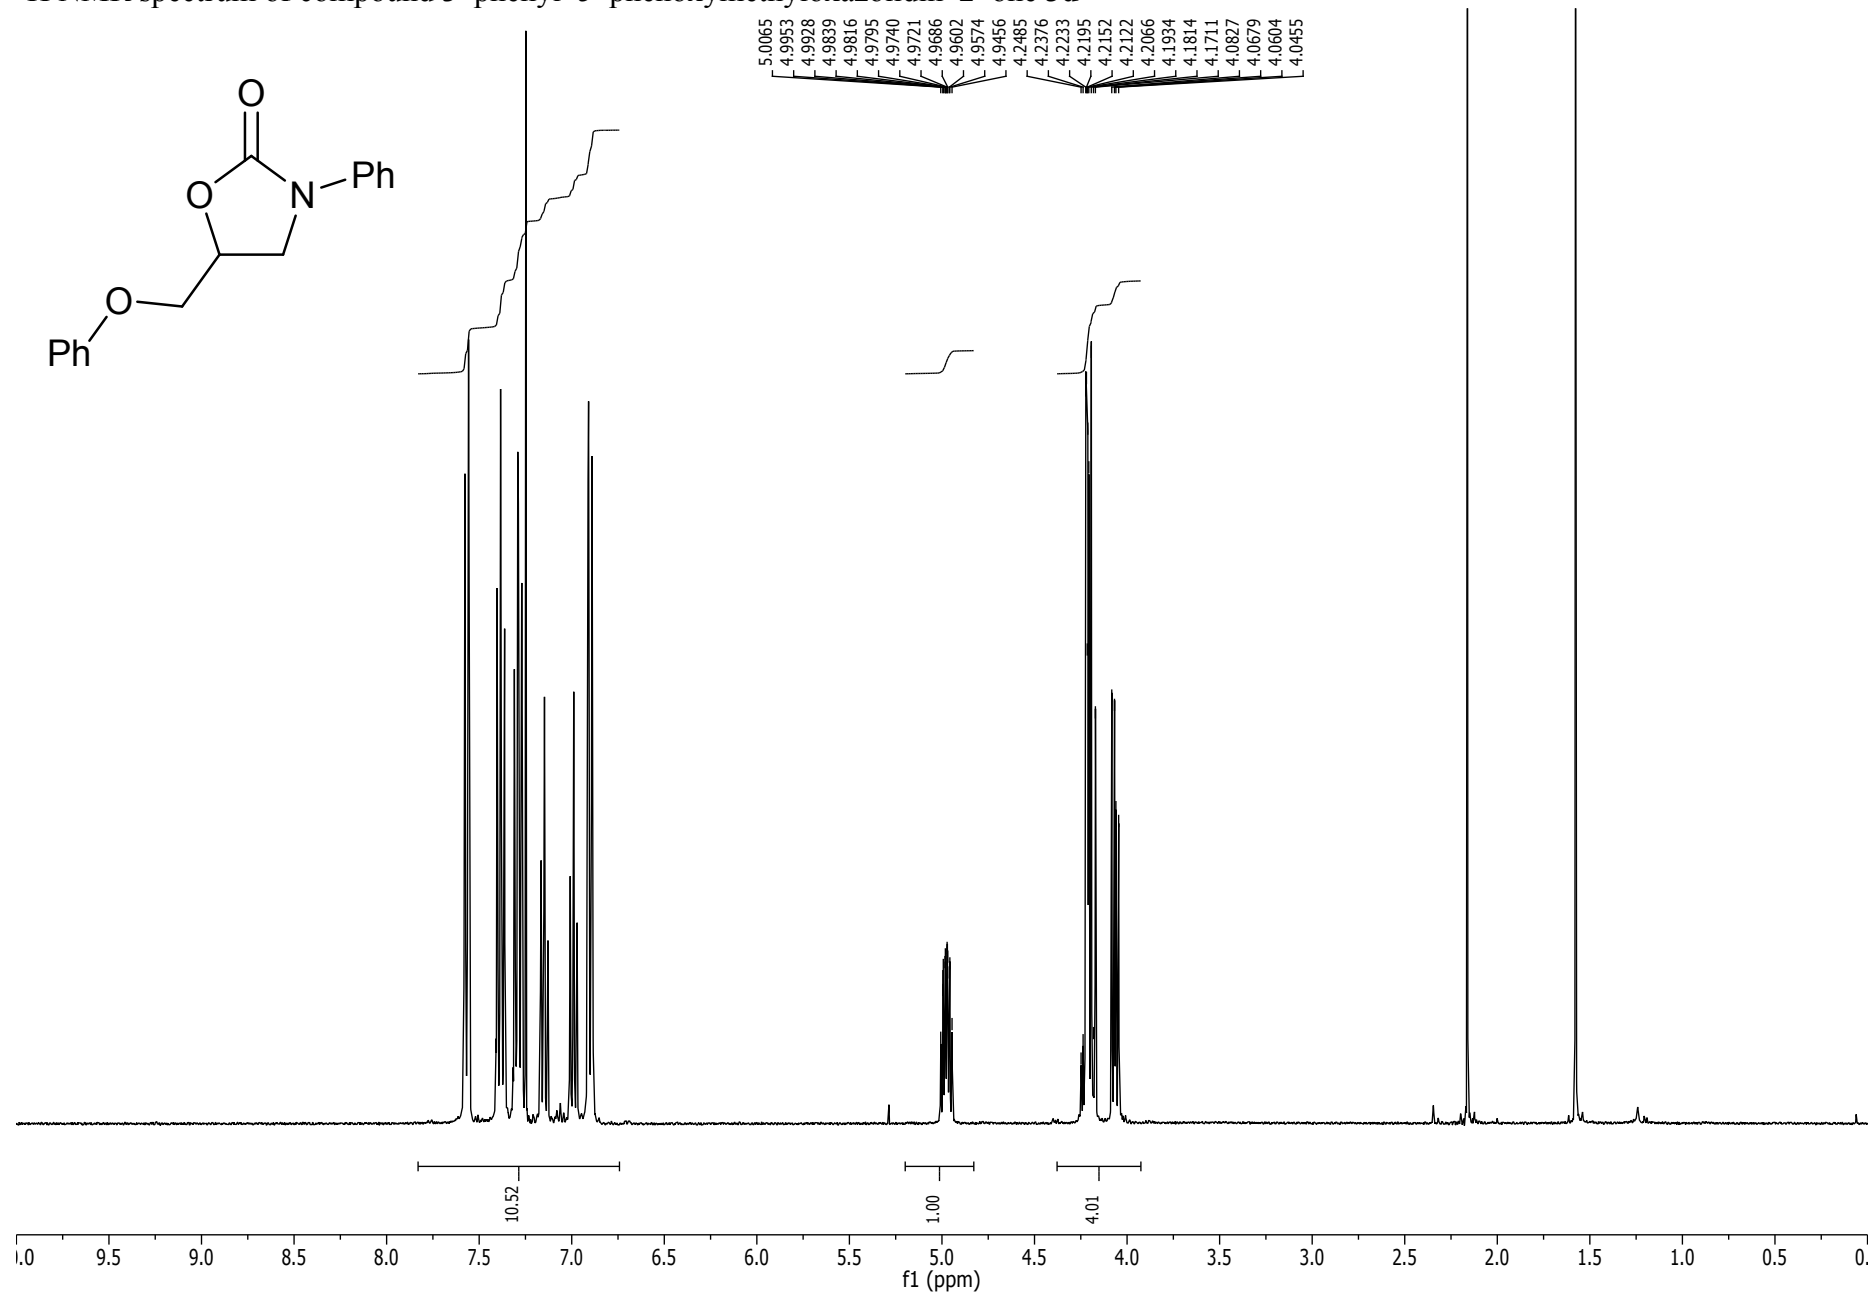

<sup>1</sup>H NMR spectrum of 3-phenyl-5-methyloxazolidin-2-one **3e**

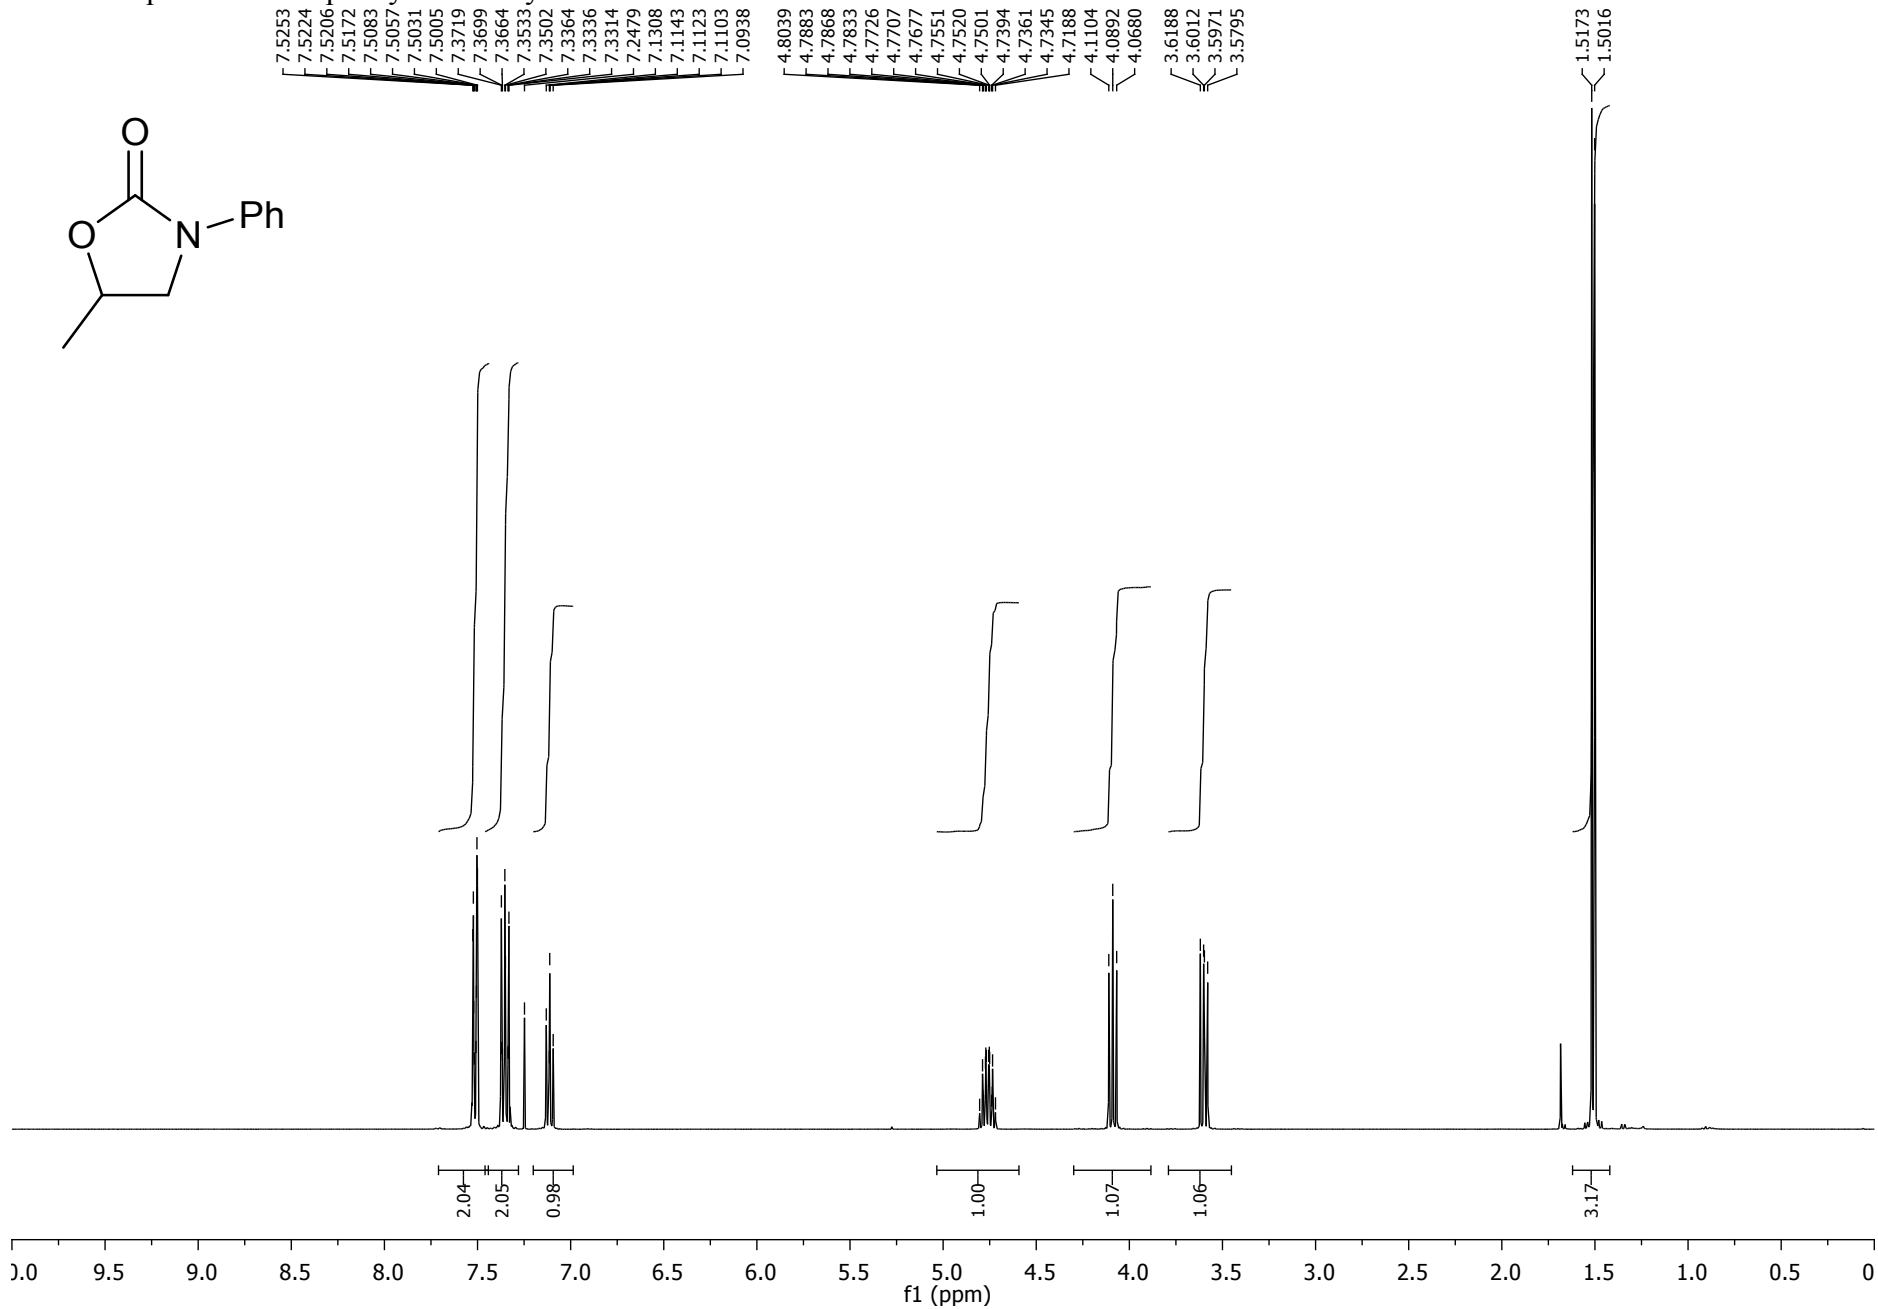

<sup>1</sup>H NMR spectrum of 3-phenyl-5-ethyloxazolidin-2-one **3f**

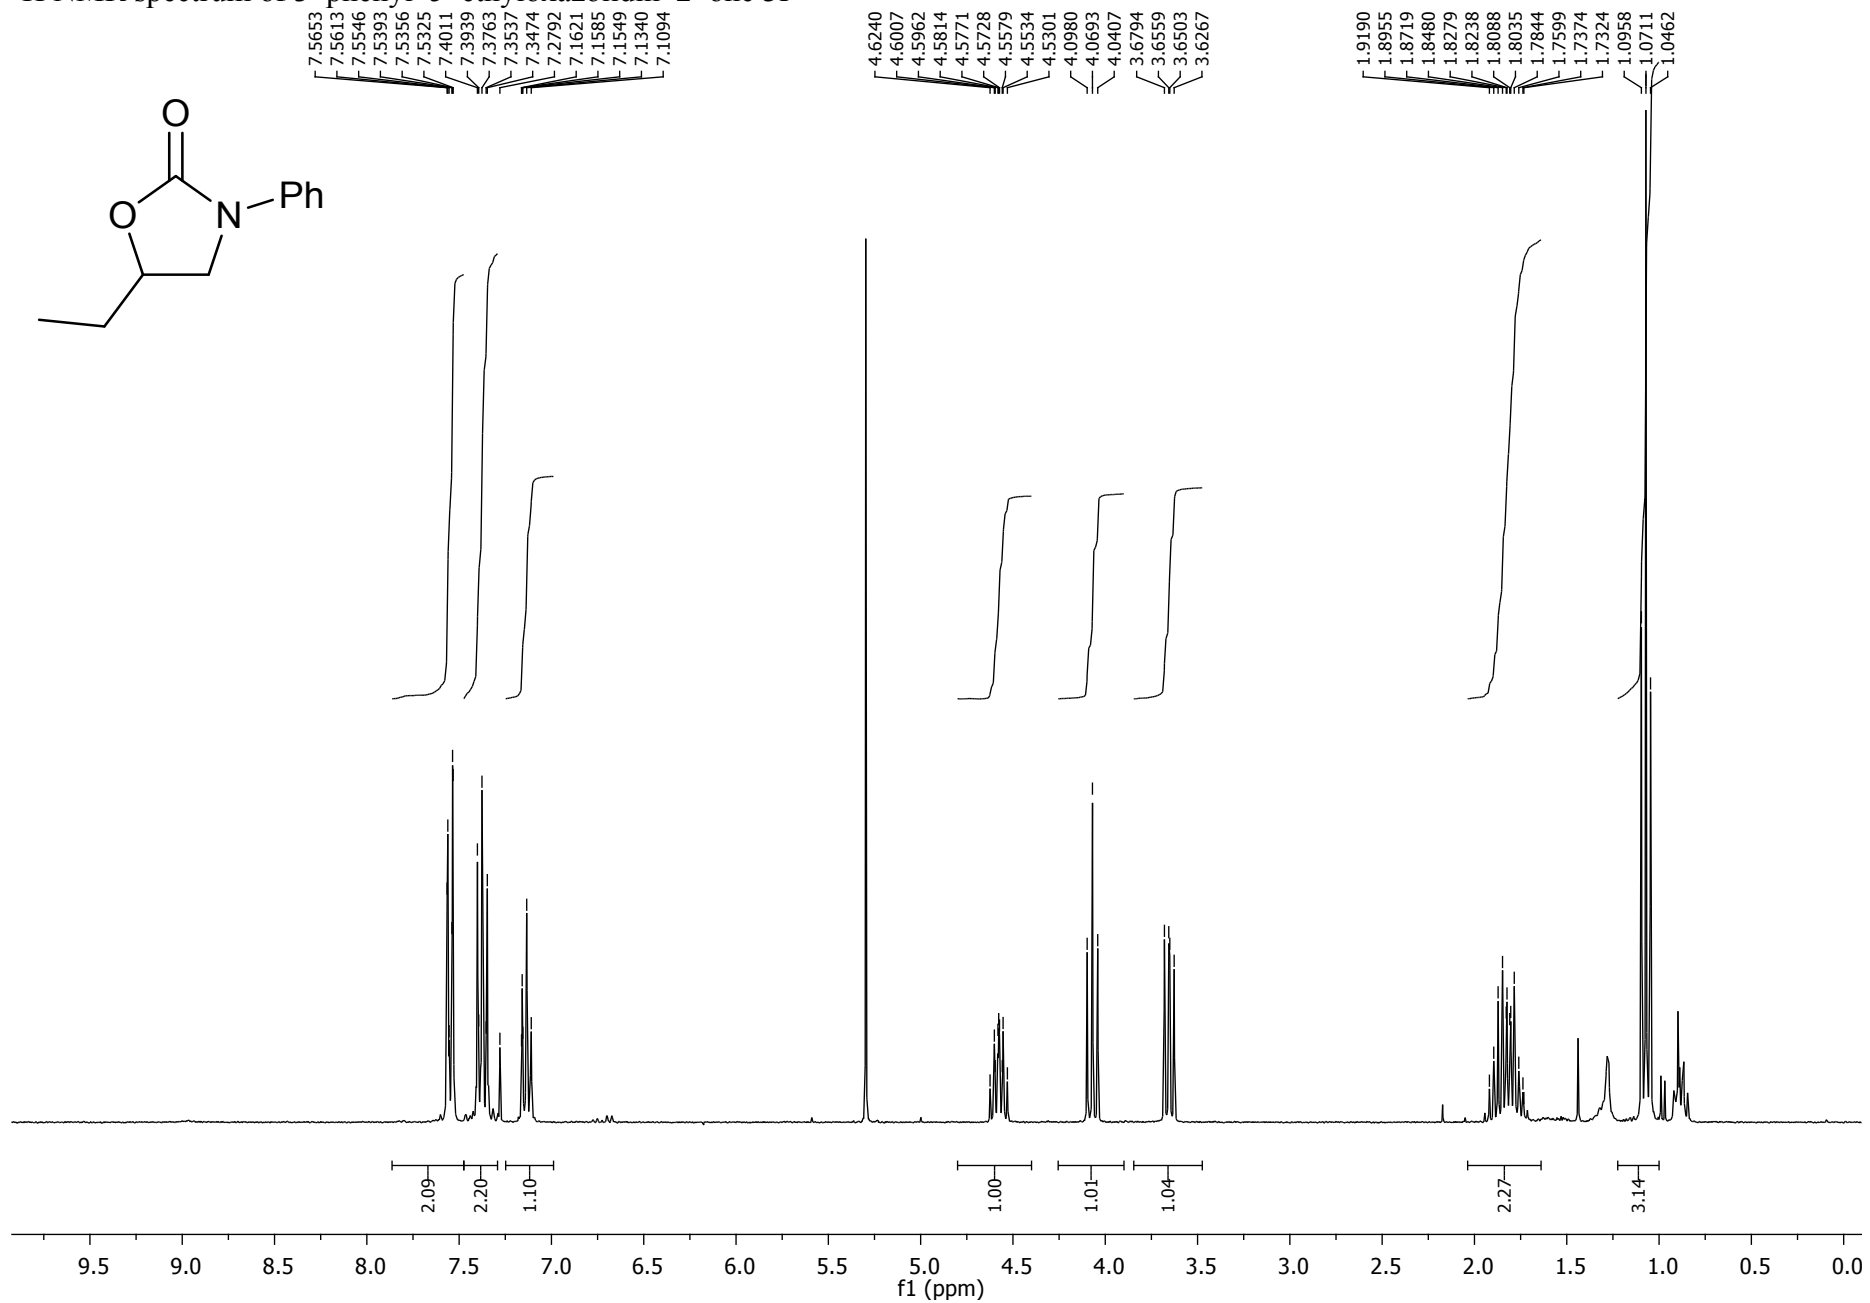

<sup>1</sup>H NMR spectrum of 3-phenyl-5-octyloxazolidin-2-one **3g**

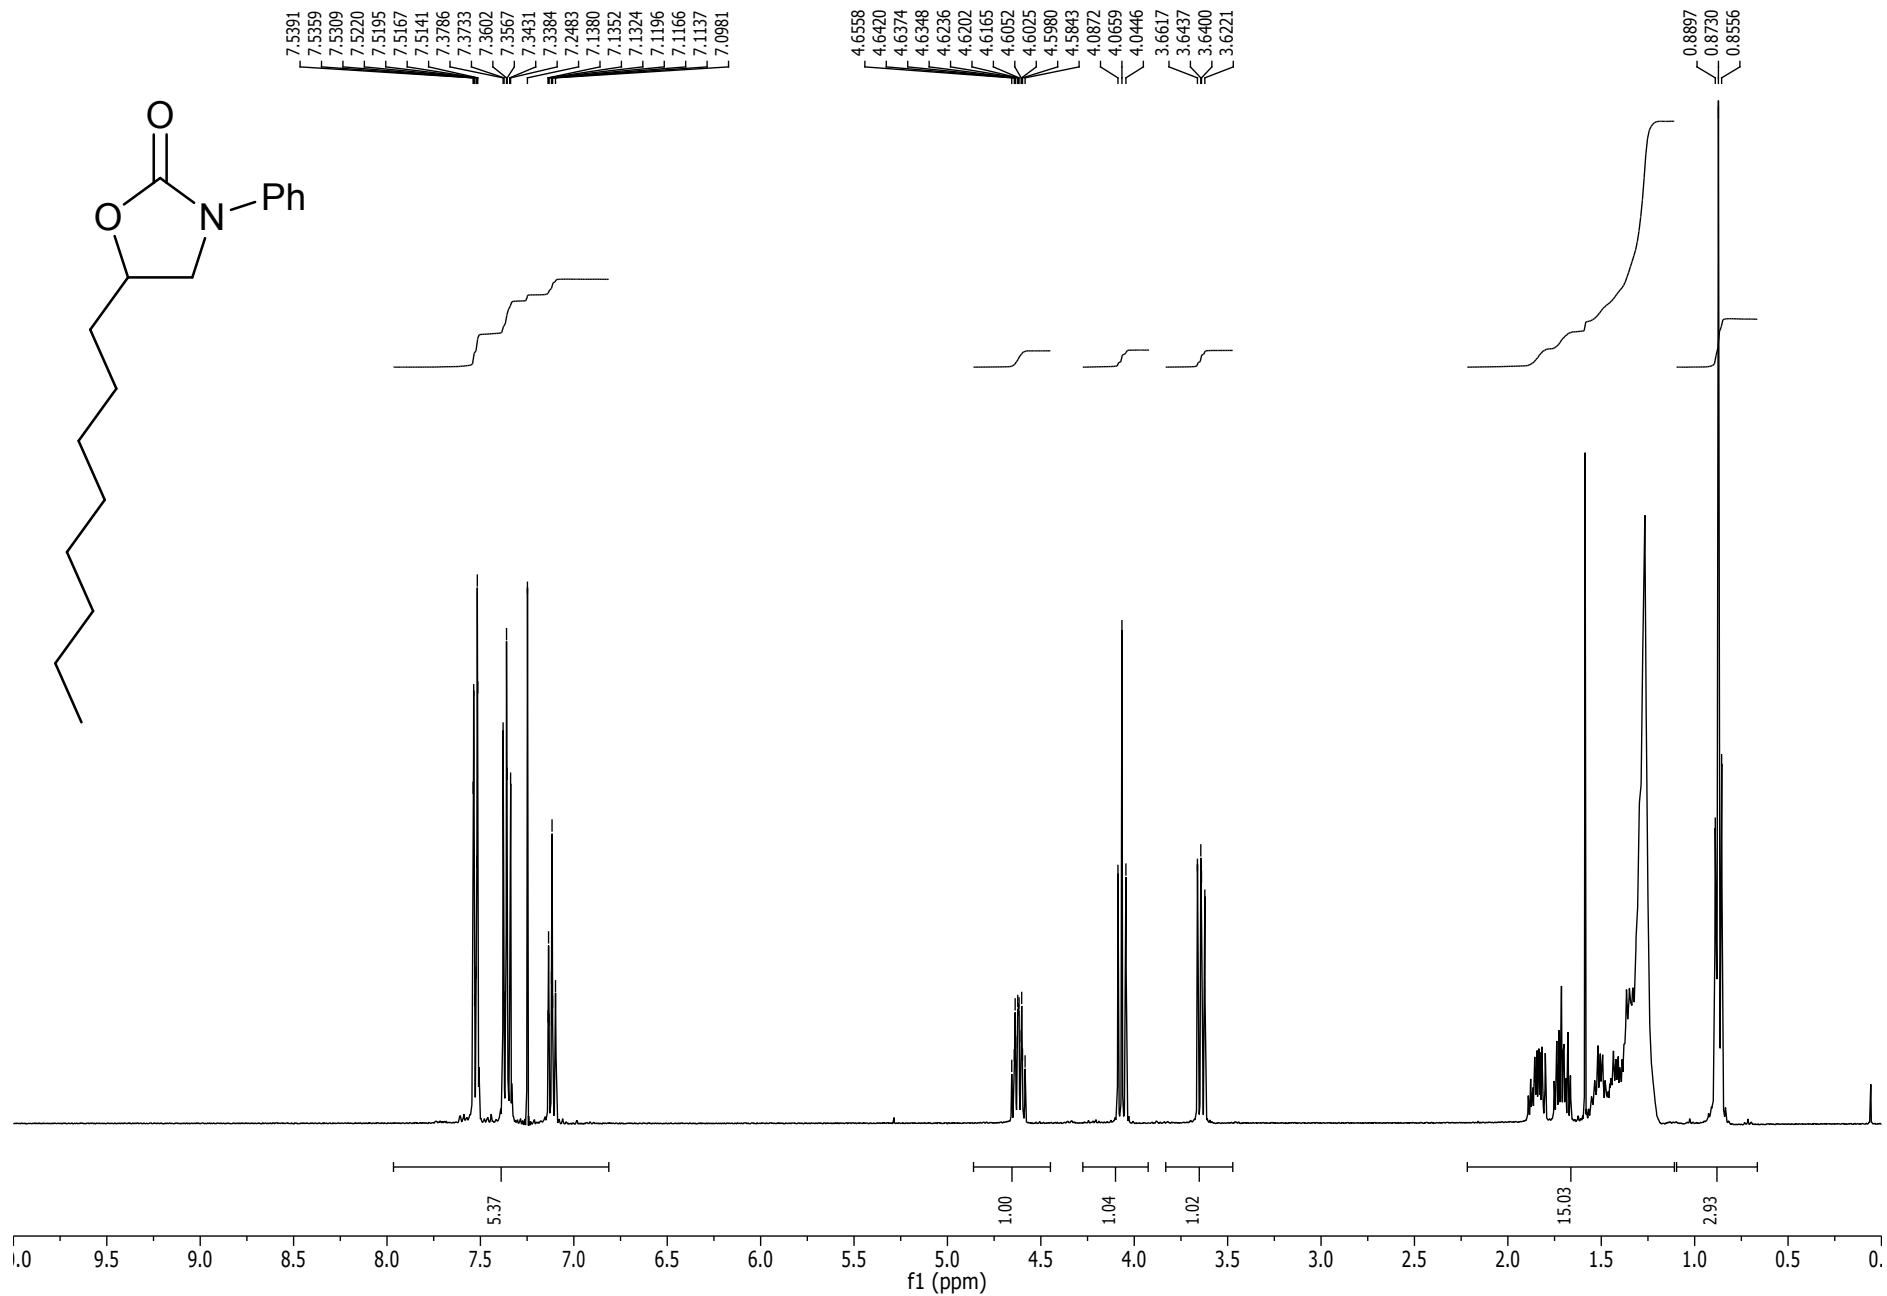



<sup>1</sup>H NMR spectrum of 3-phenyl-4-hydroxymethyloxazolidin-2-one **4h**

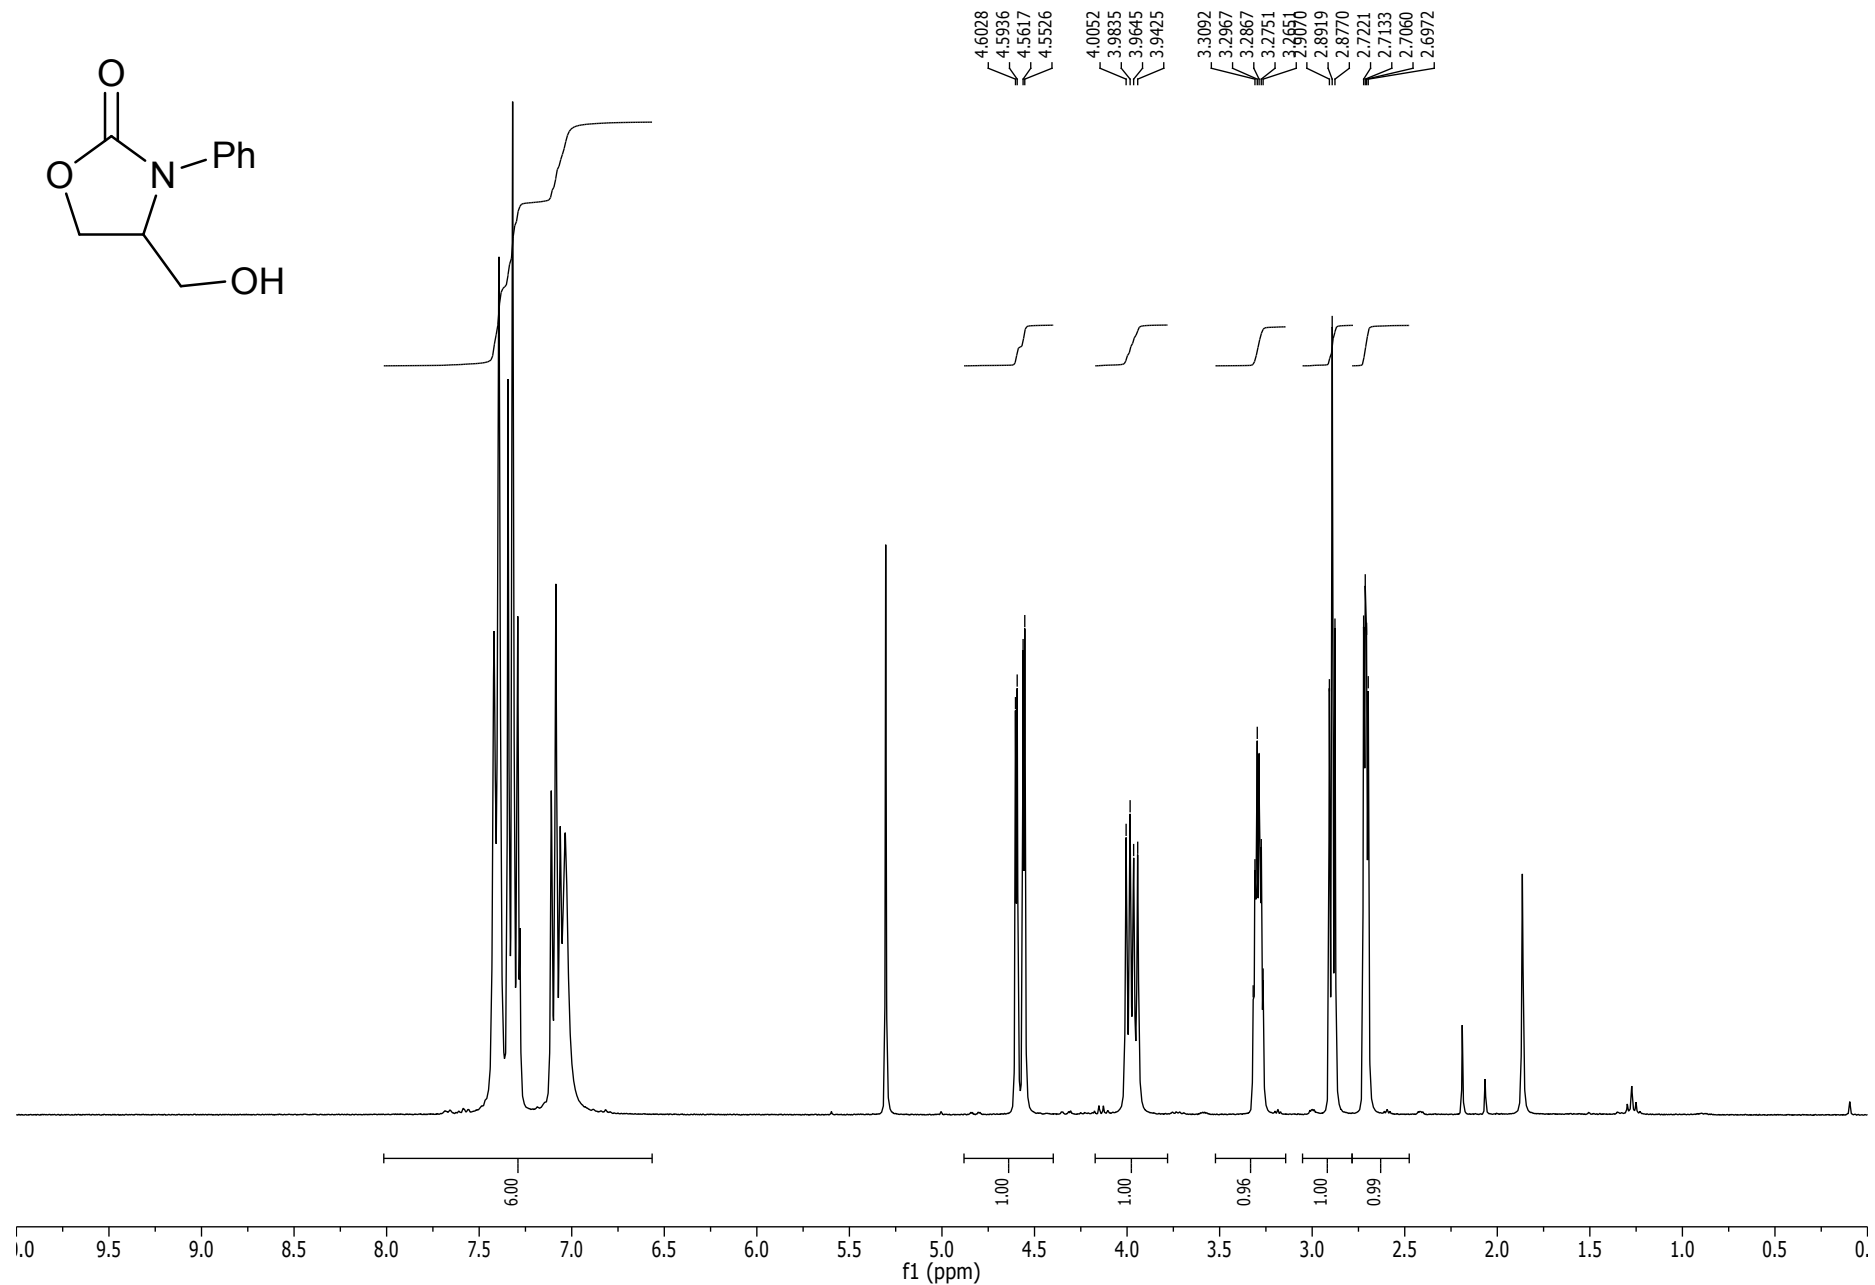

<sup>1</sup>H NMR spectrum of 3-(4-fluorophenyl)-4-phenyloxazolidin-2-one **4i**

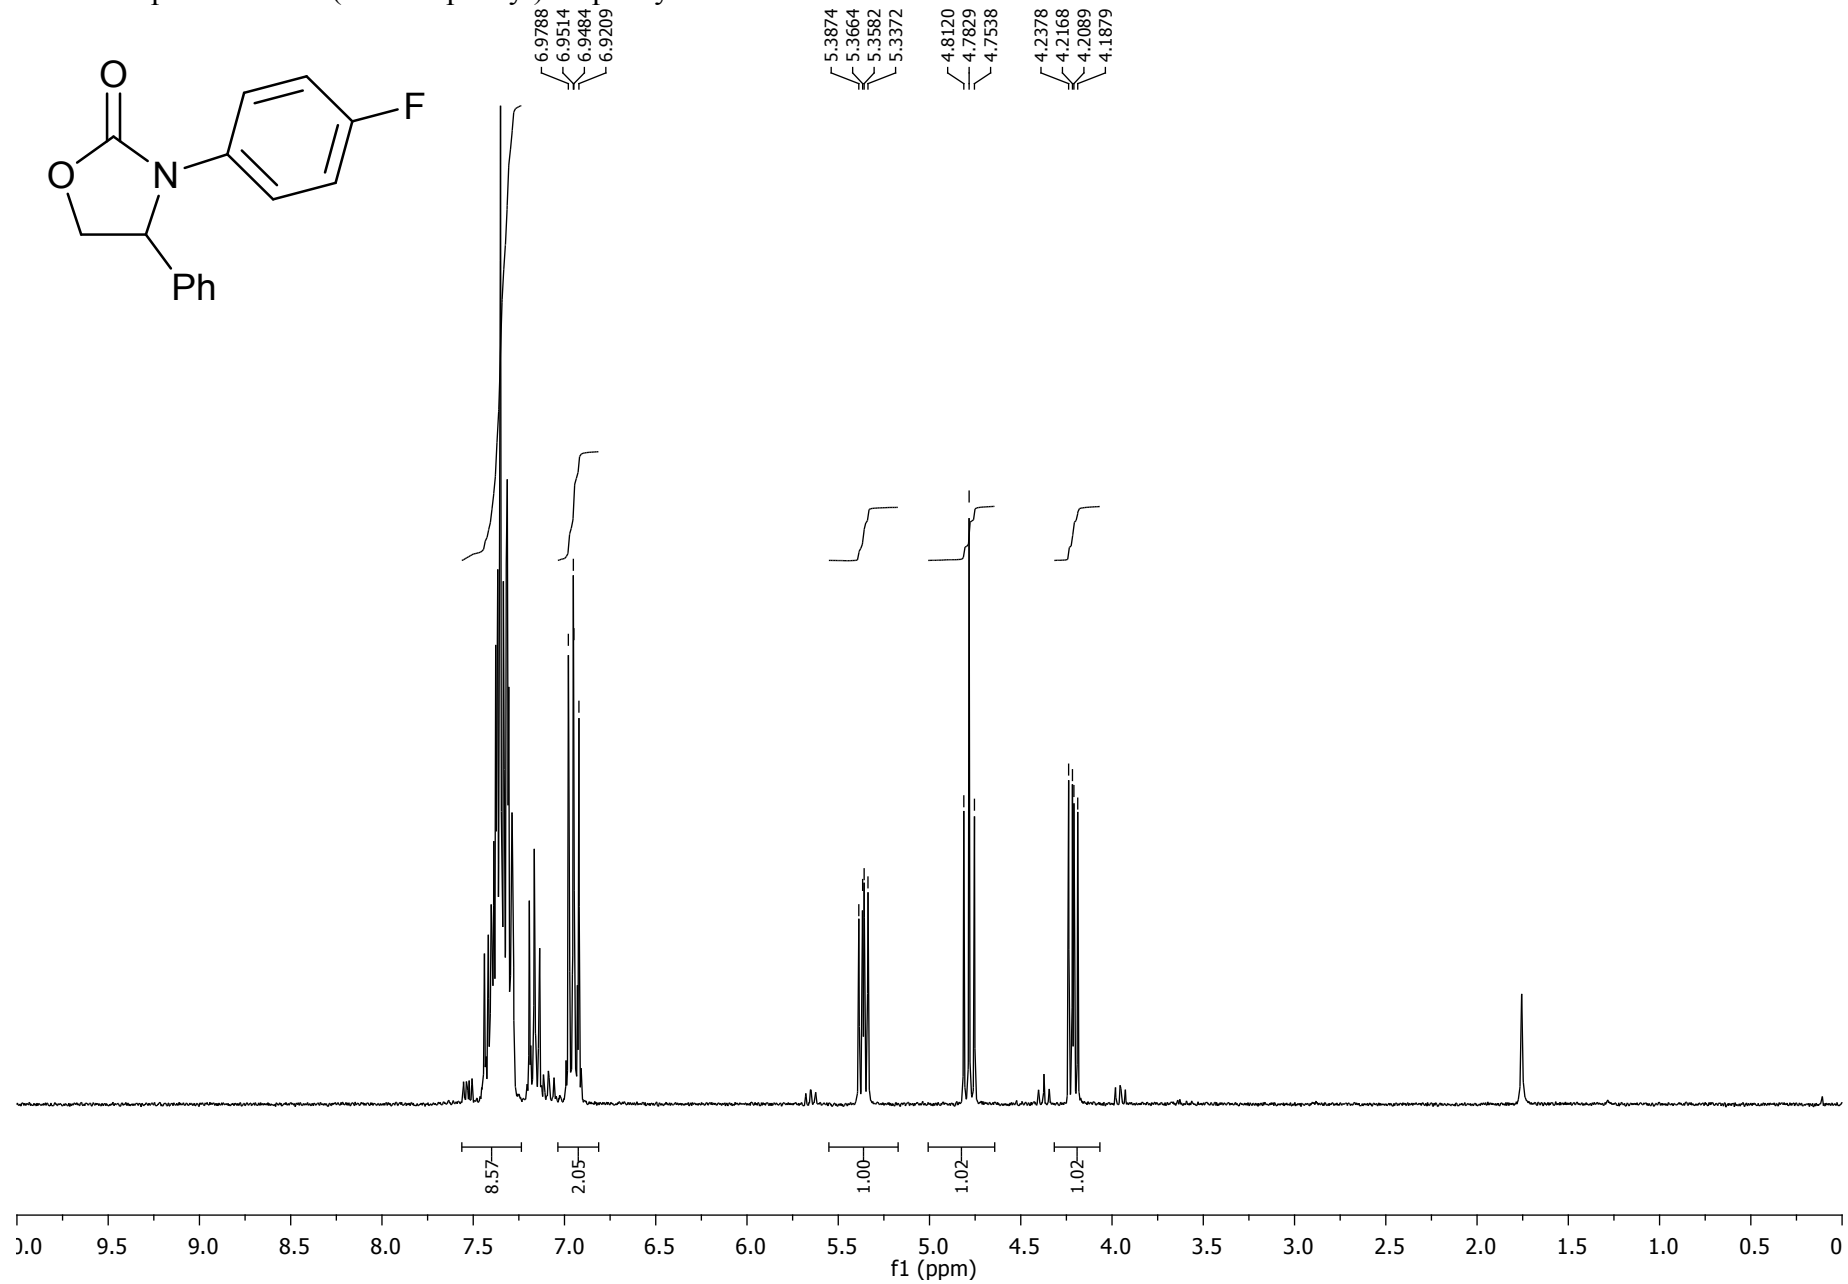

$^1\text{H}$  NMR spectrum of 3-(4-chlorophenyl)-4-phenyloxazolidin-2-one **4j**

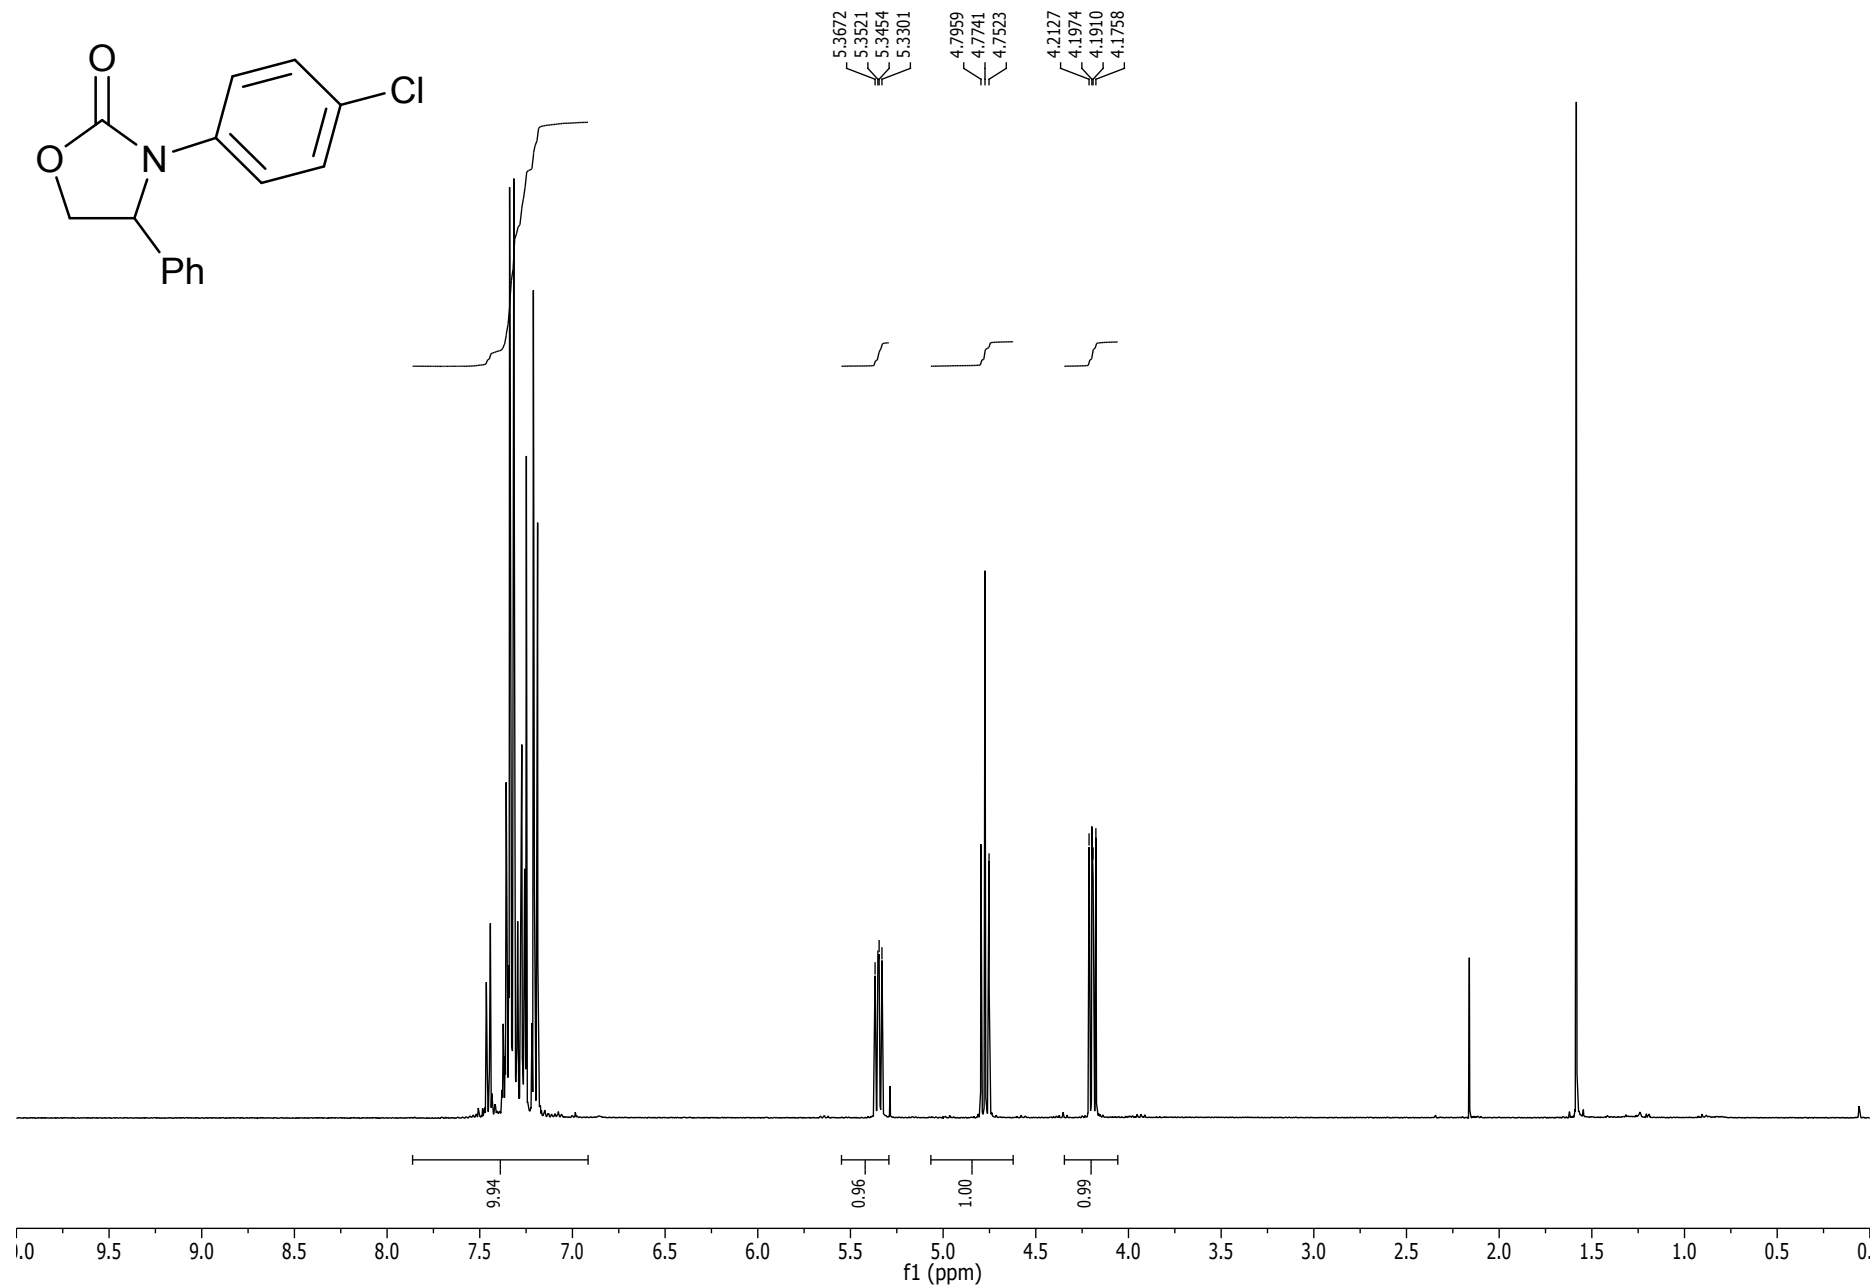

<sup>1</sup>H NMR spectrum of 3-(4-bromophenyl)-4-phenyloxazolidin-2-one **4k**

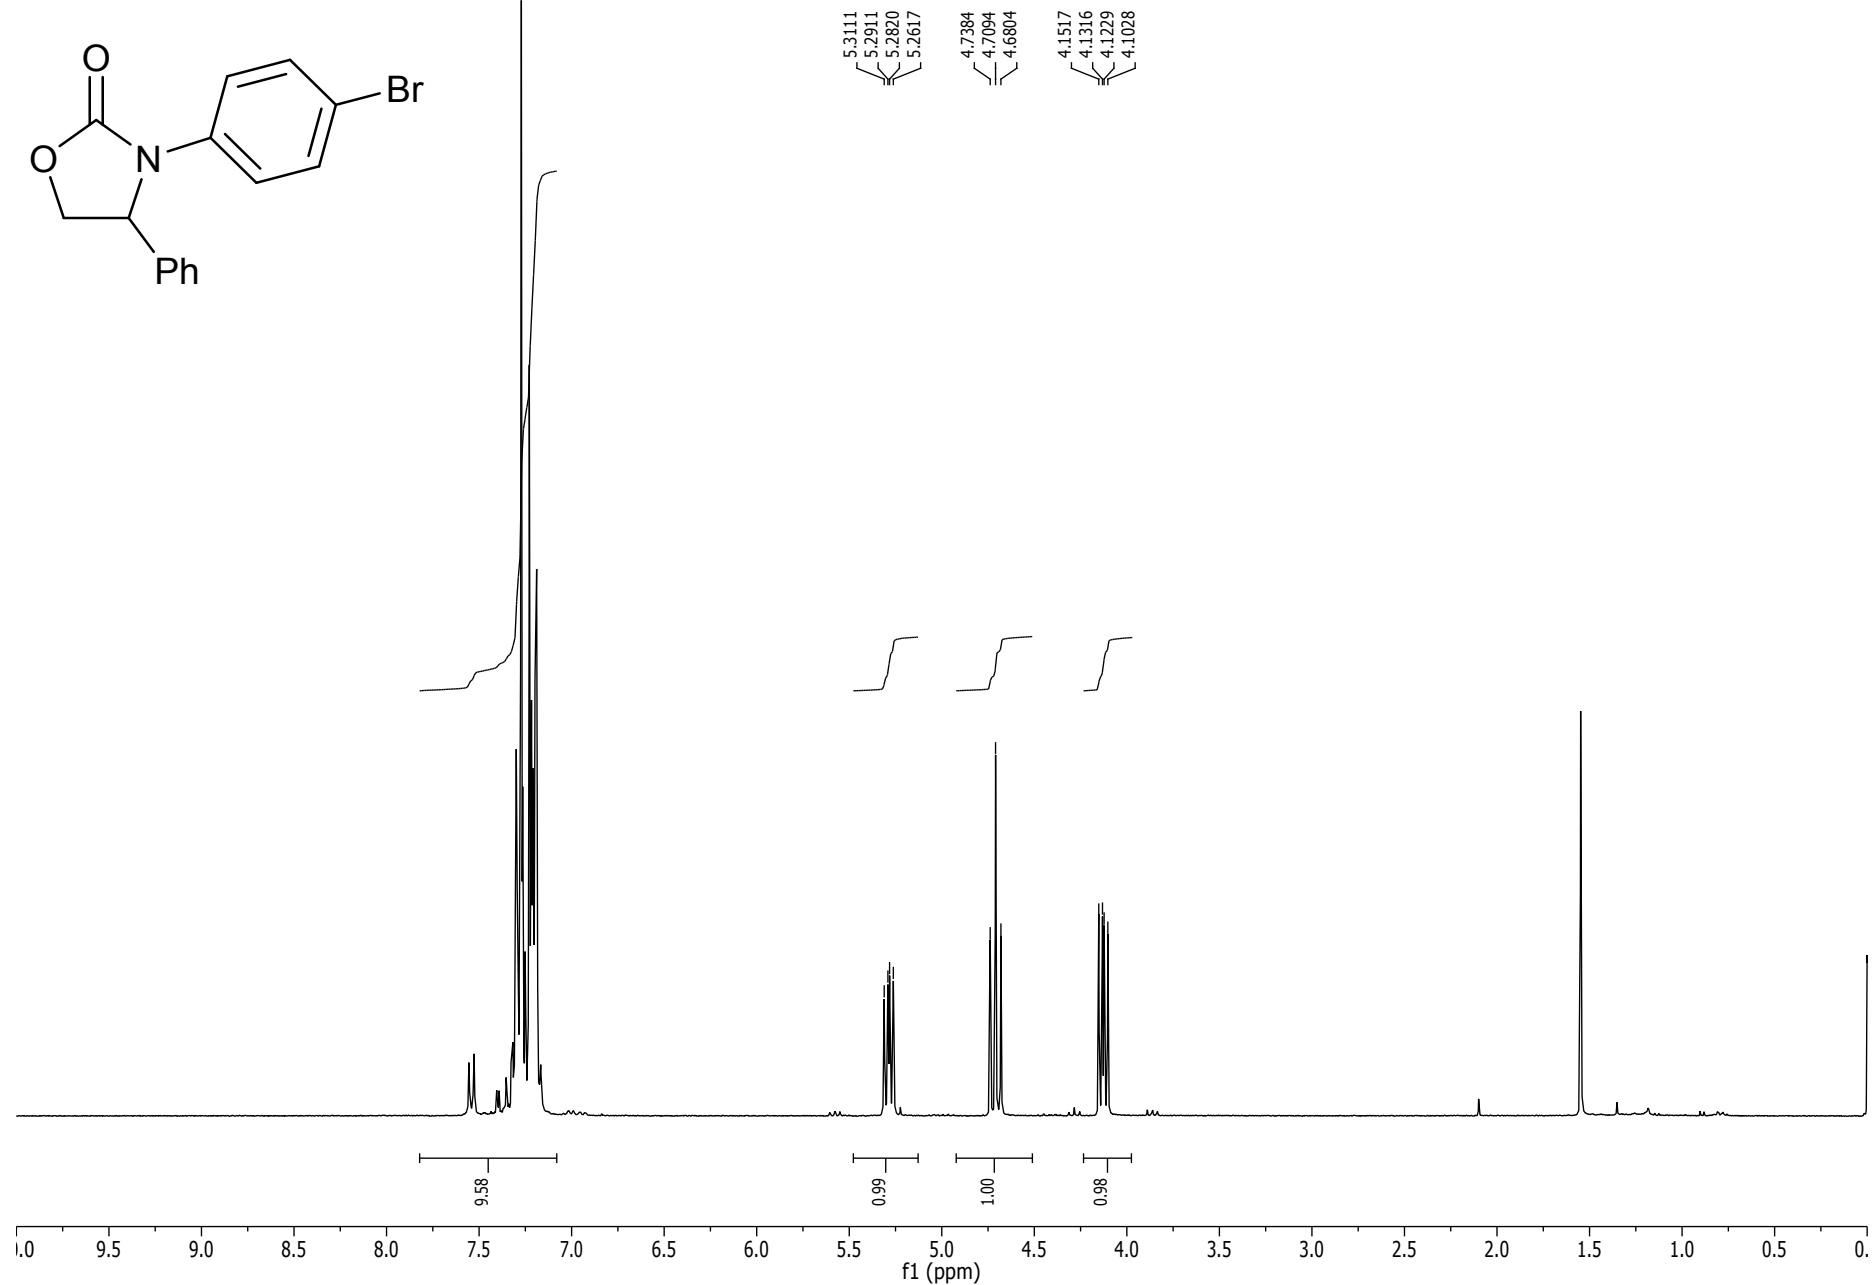

<sup>1</sup>H NMR spectrum of 3-(4-methoxyphenyl)-4-phenyloxazolidin-2-one **4l**

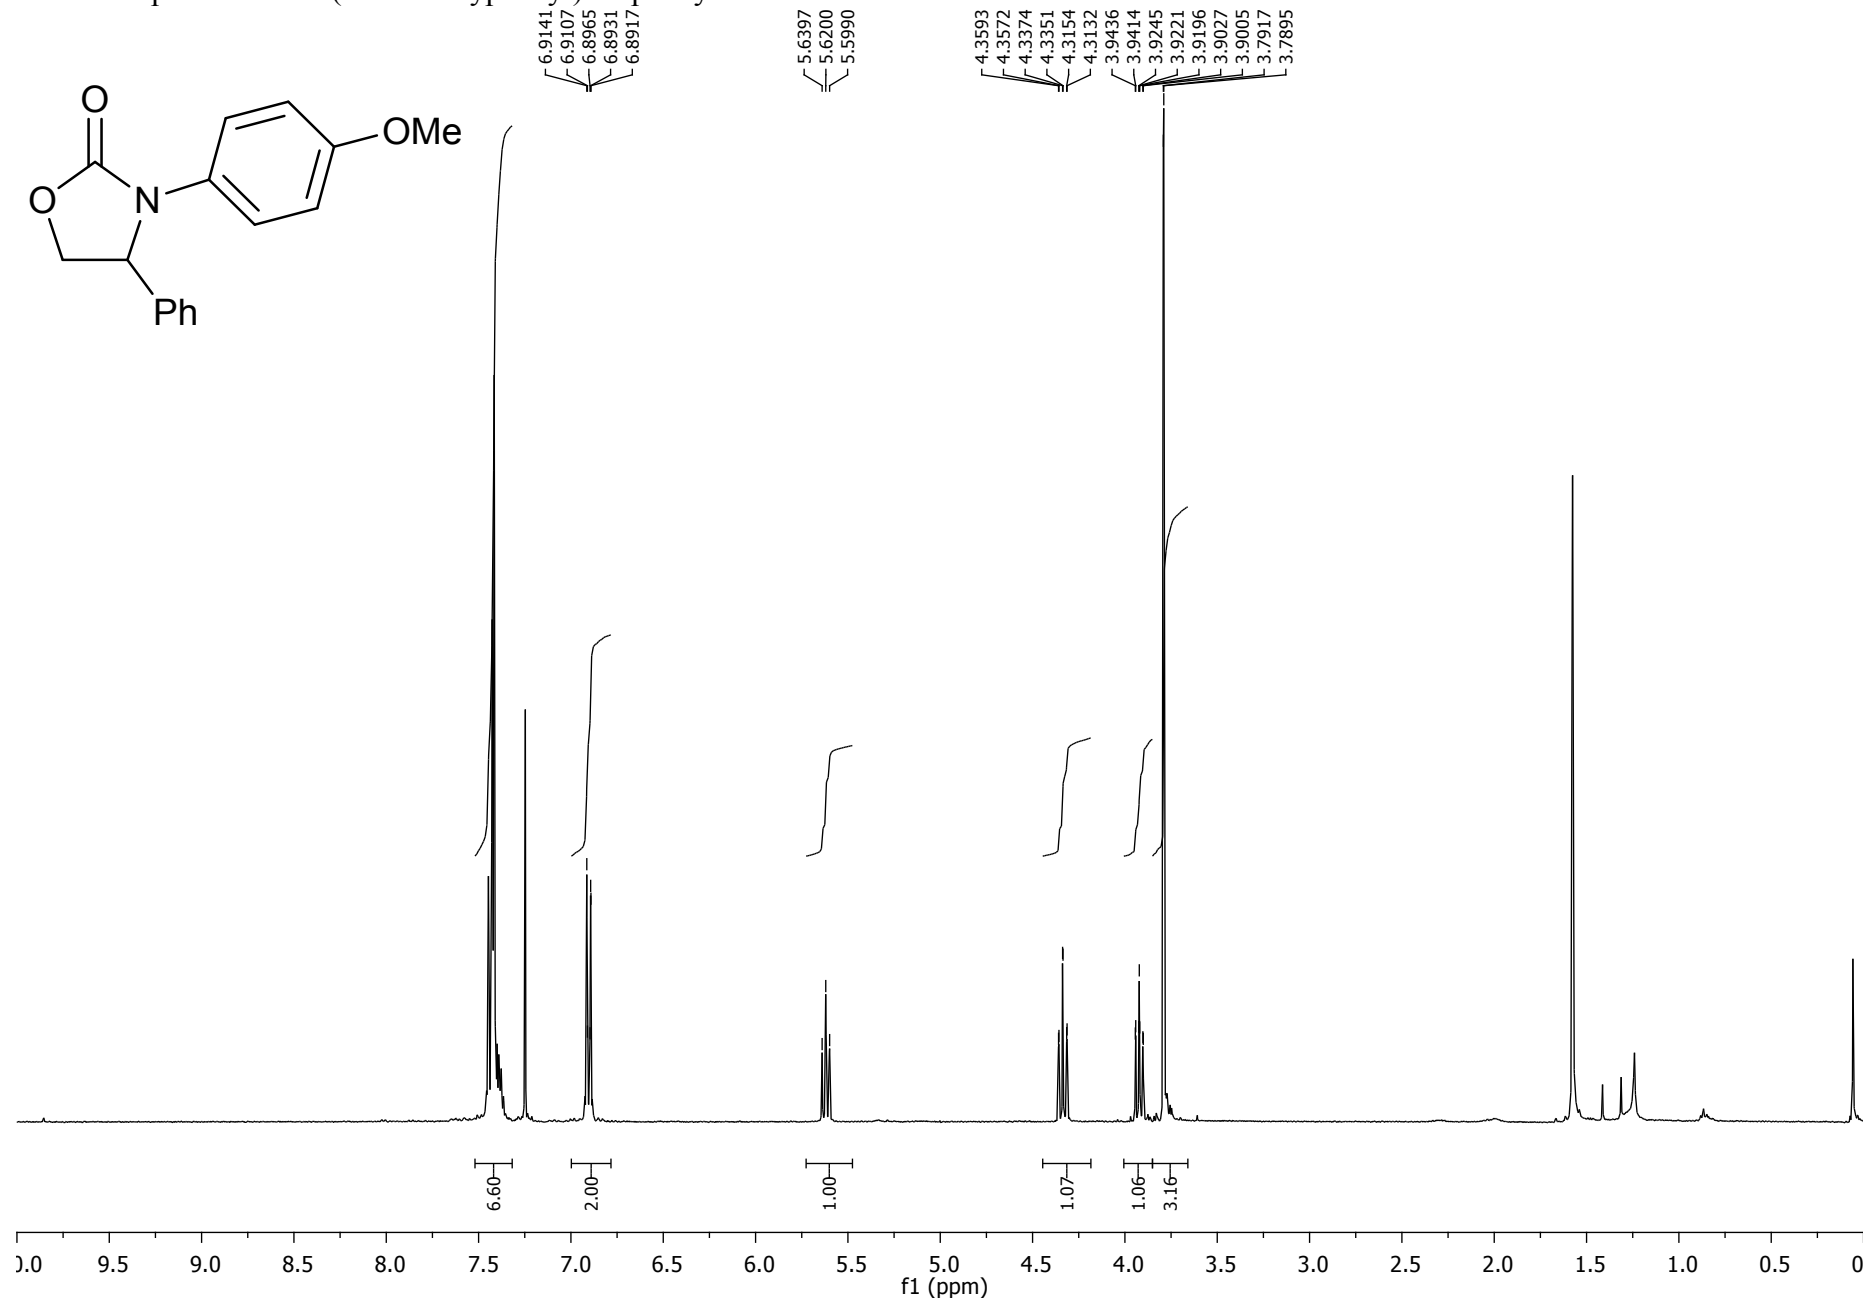

<sup>1</sup>H NMR spectrum of 3-(4-methylphenyl)-4-phenyloxazolidin-2-one **4m**

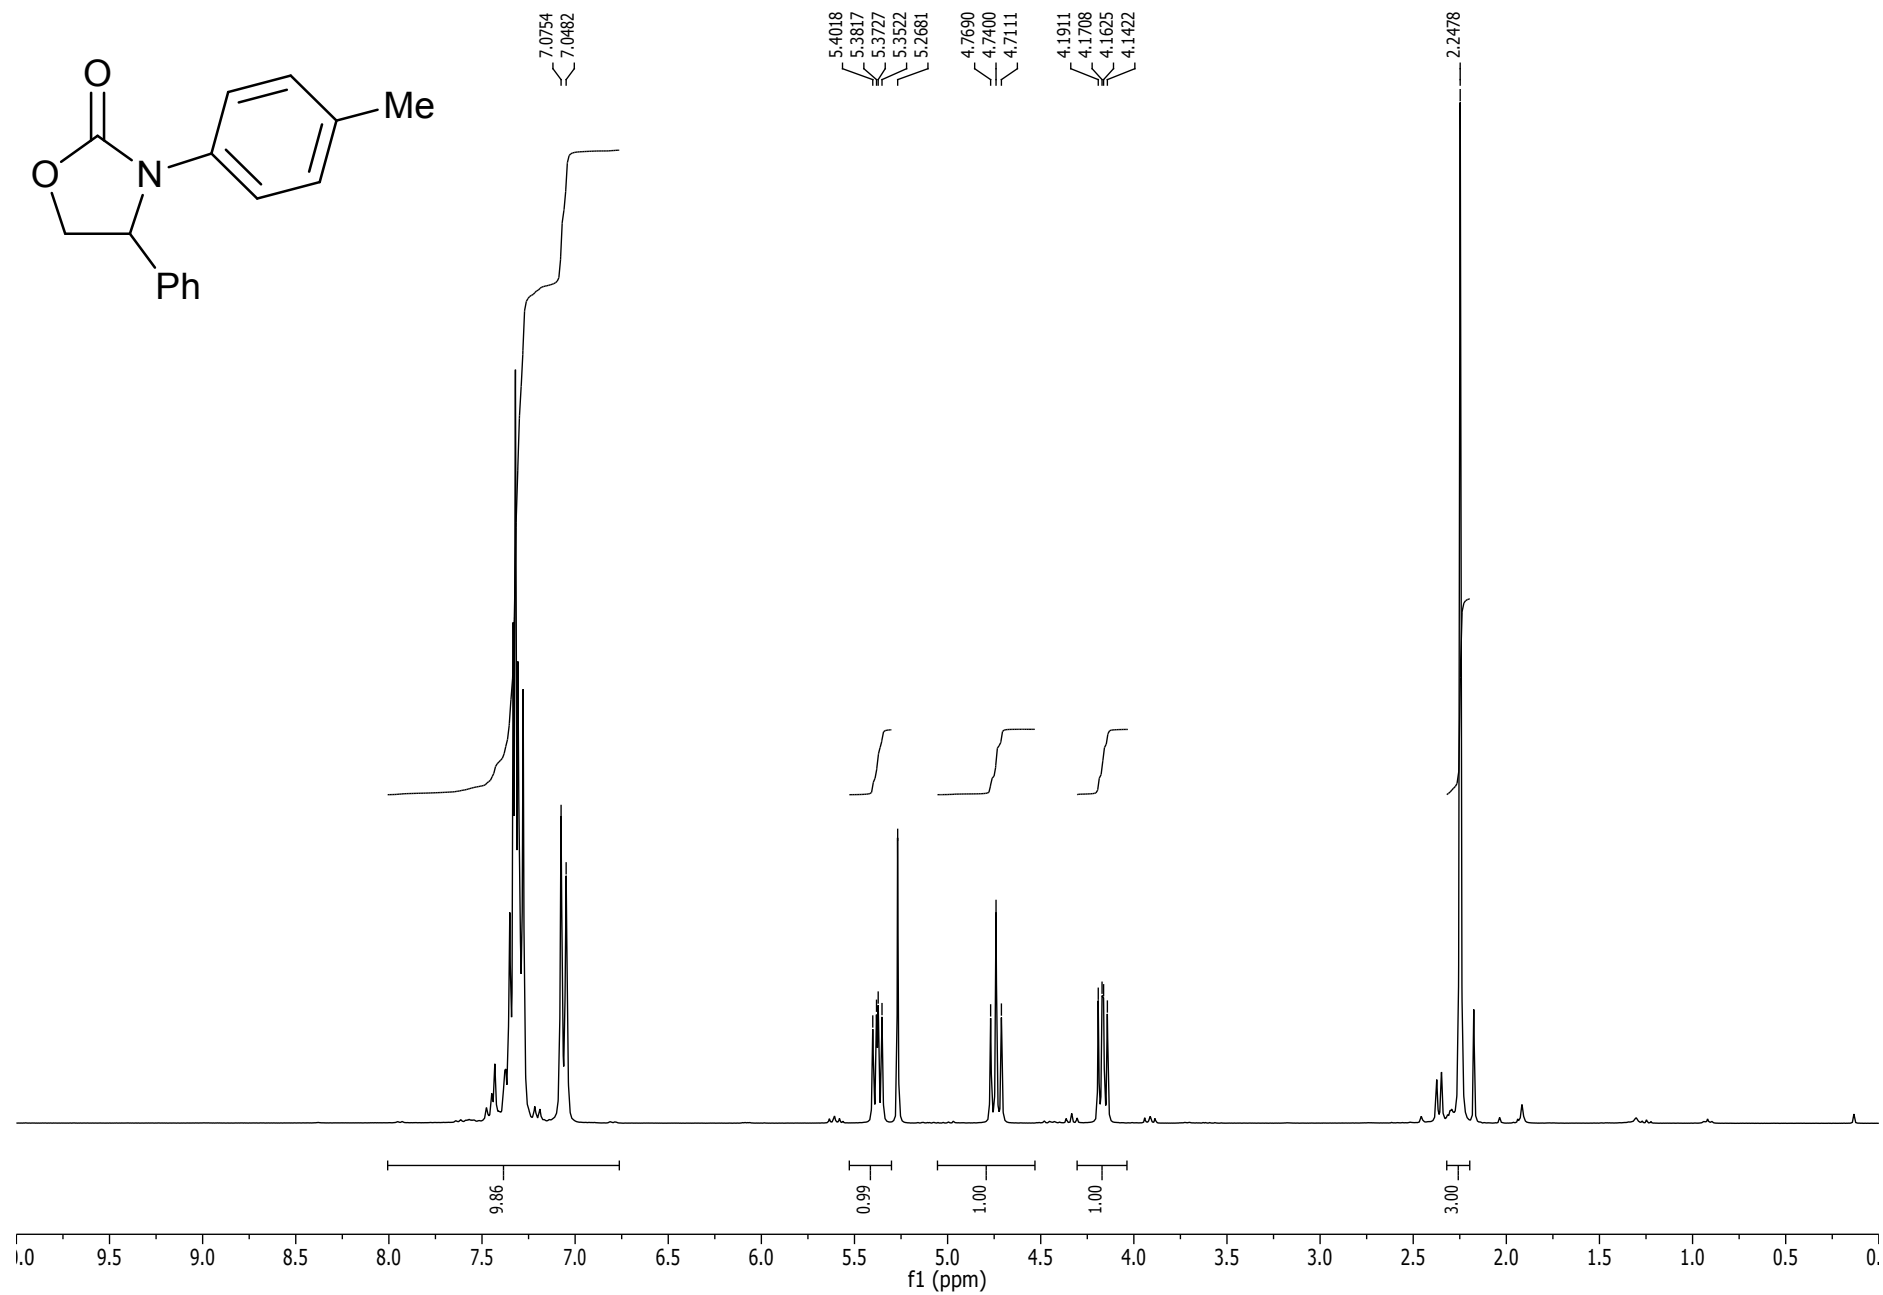

<sup>1</sup>H NMR spectrum of 3-(4-Fluorophenyl)-5-chloromethyloxazolidin-2-one **3n**

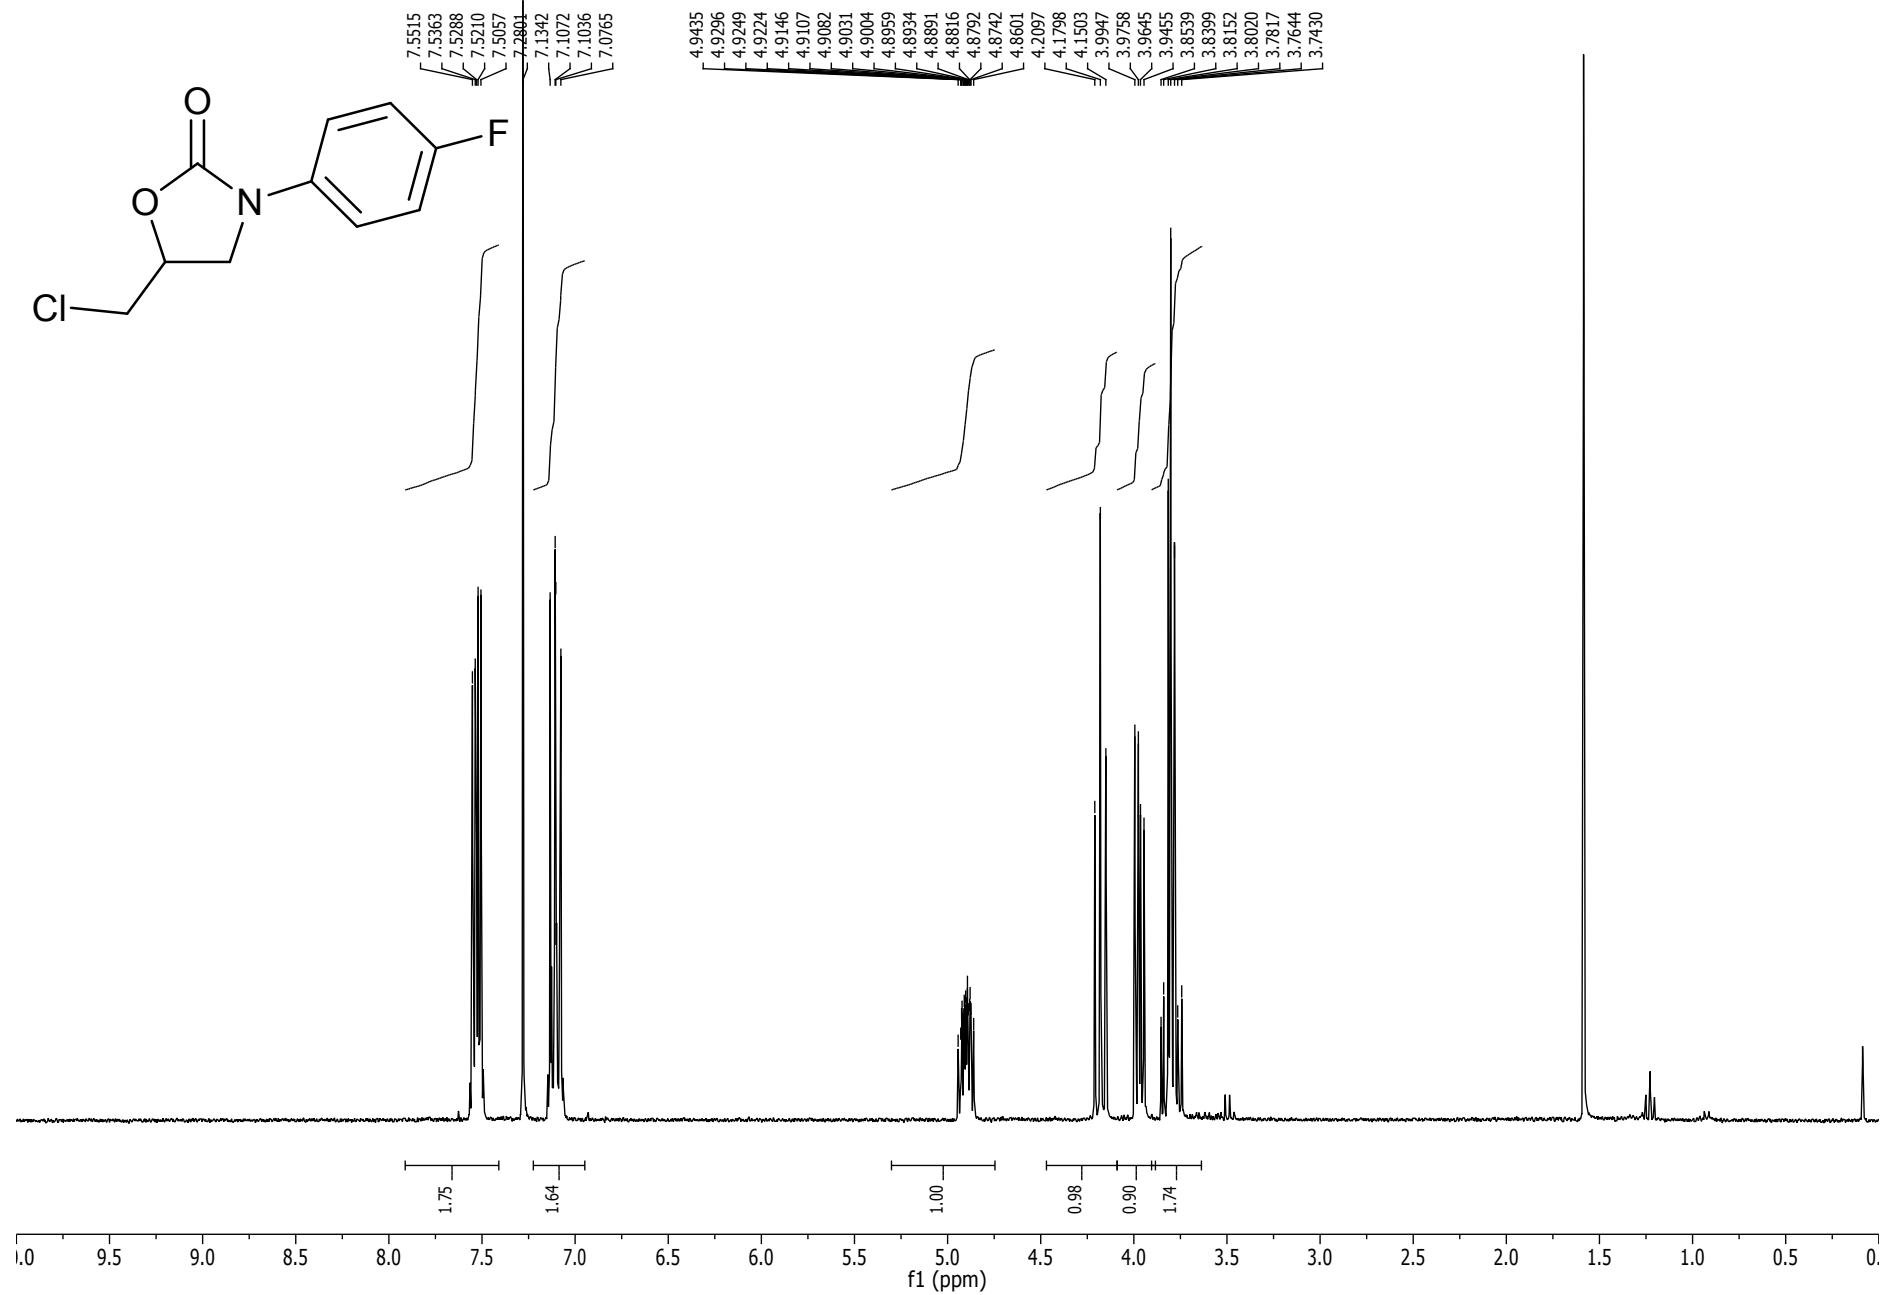

<sup>1</sup>H NMR spectrum of 3-(4-chlorophenyl)-5-chloromethyloxazolidin-2-one **3o**

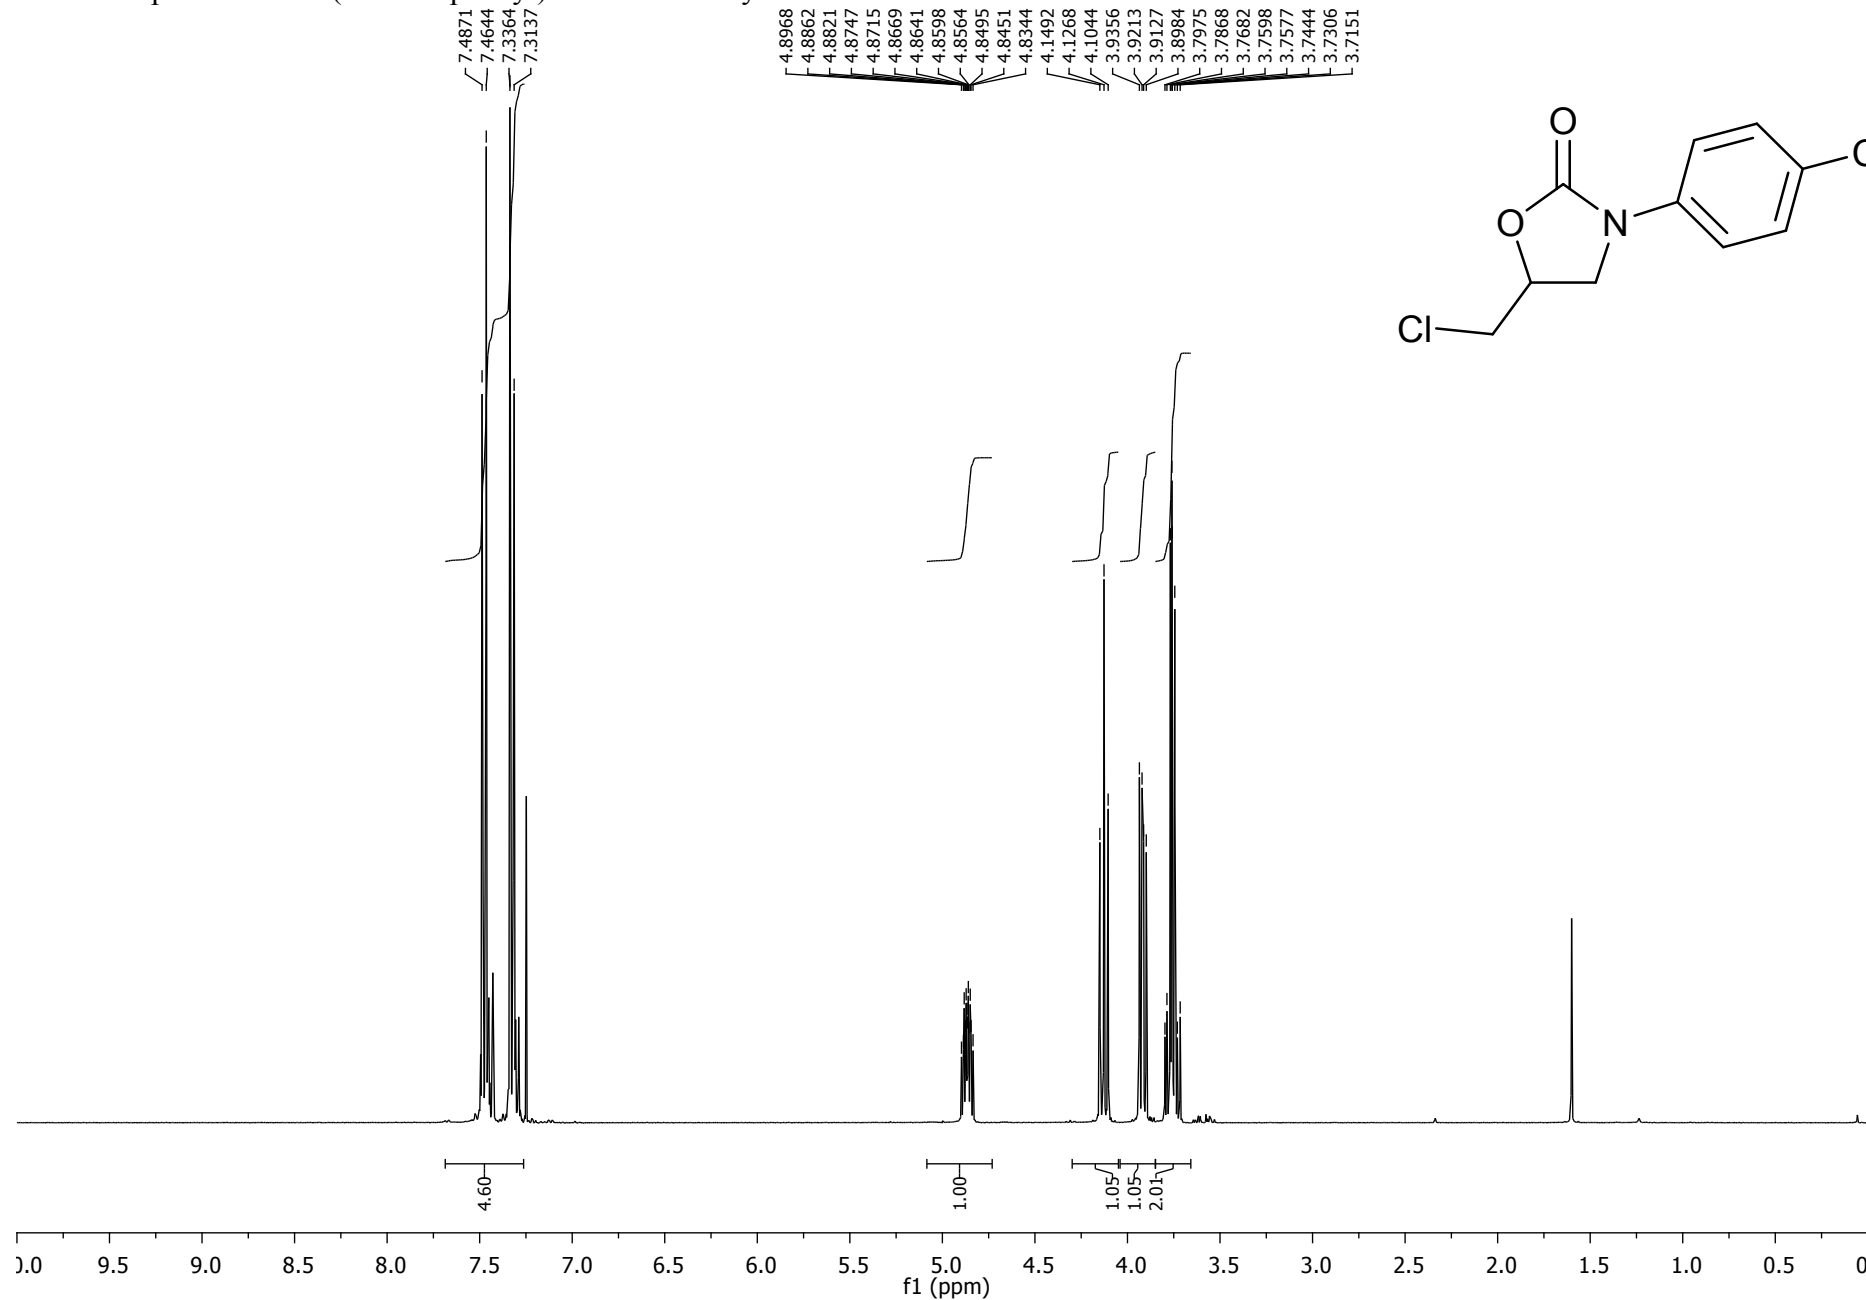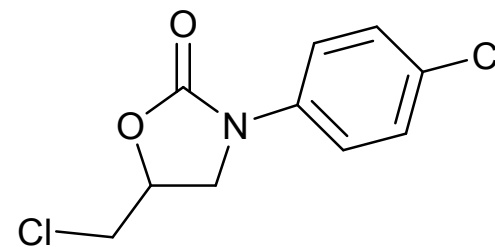



<sup>1</sup>H NMR spectrum of 3-(4-bromophenyl)-5-chloromethyloxazolidin-2-one **3p**

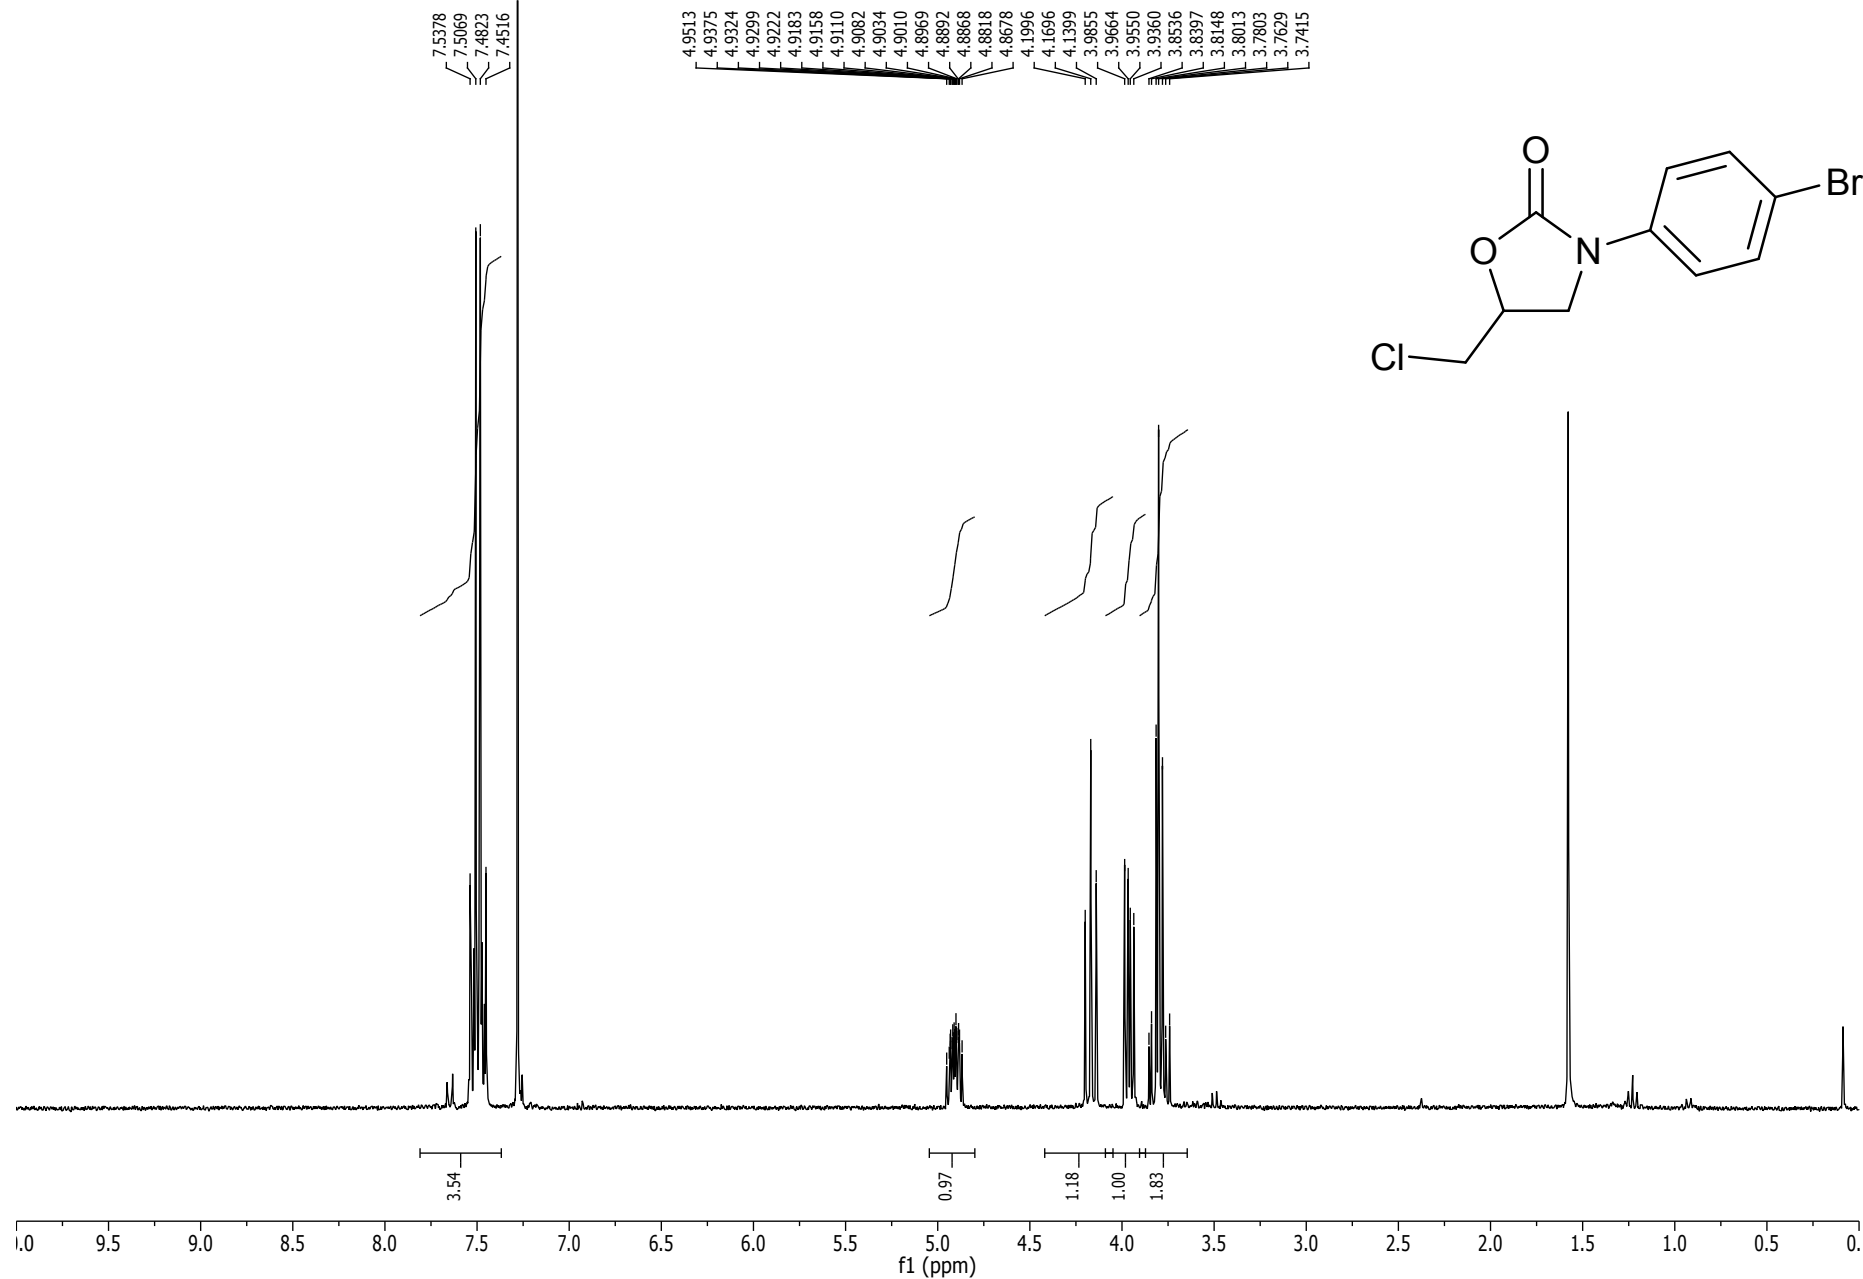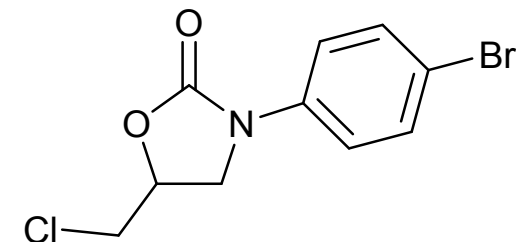

<sup>1</sup>H NMR spectrum of 3-(4-methoxyphenyl)-5-chloromethoxazolidin-2-one **3q**

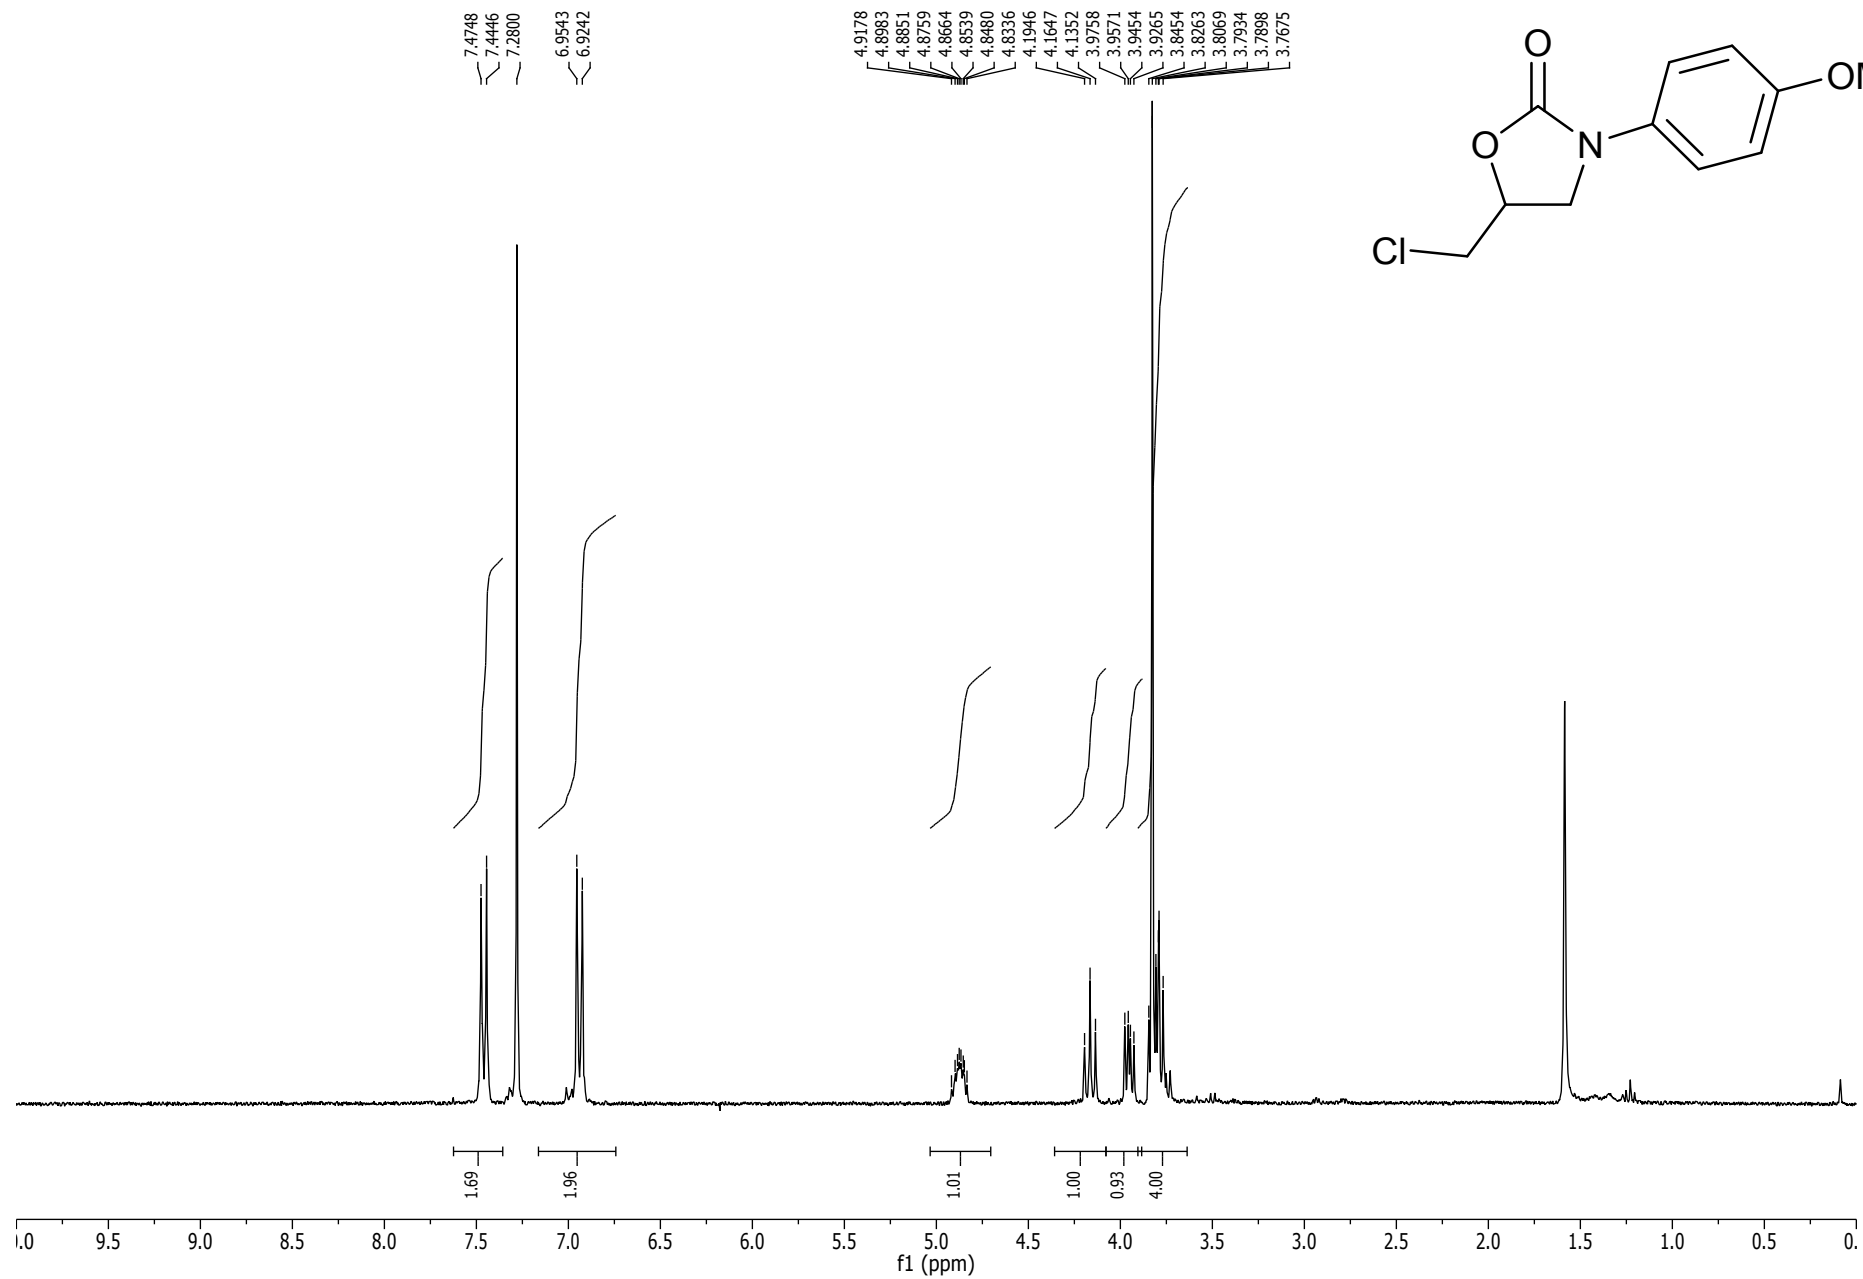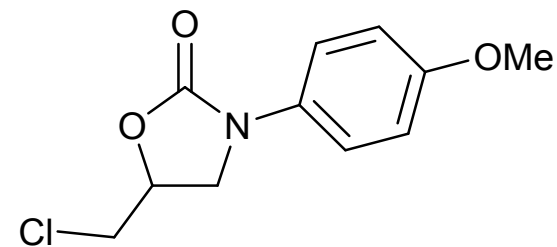

<sup>1</sup>H NMR spectrum of 3-(4-methylphenyl)-5-chloromethylloxazolidin-2-one **3r**

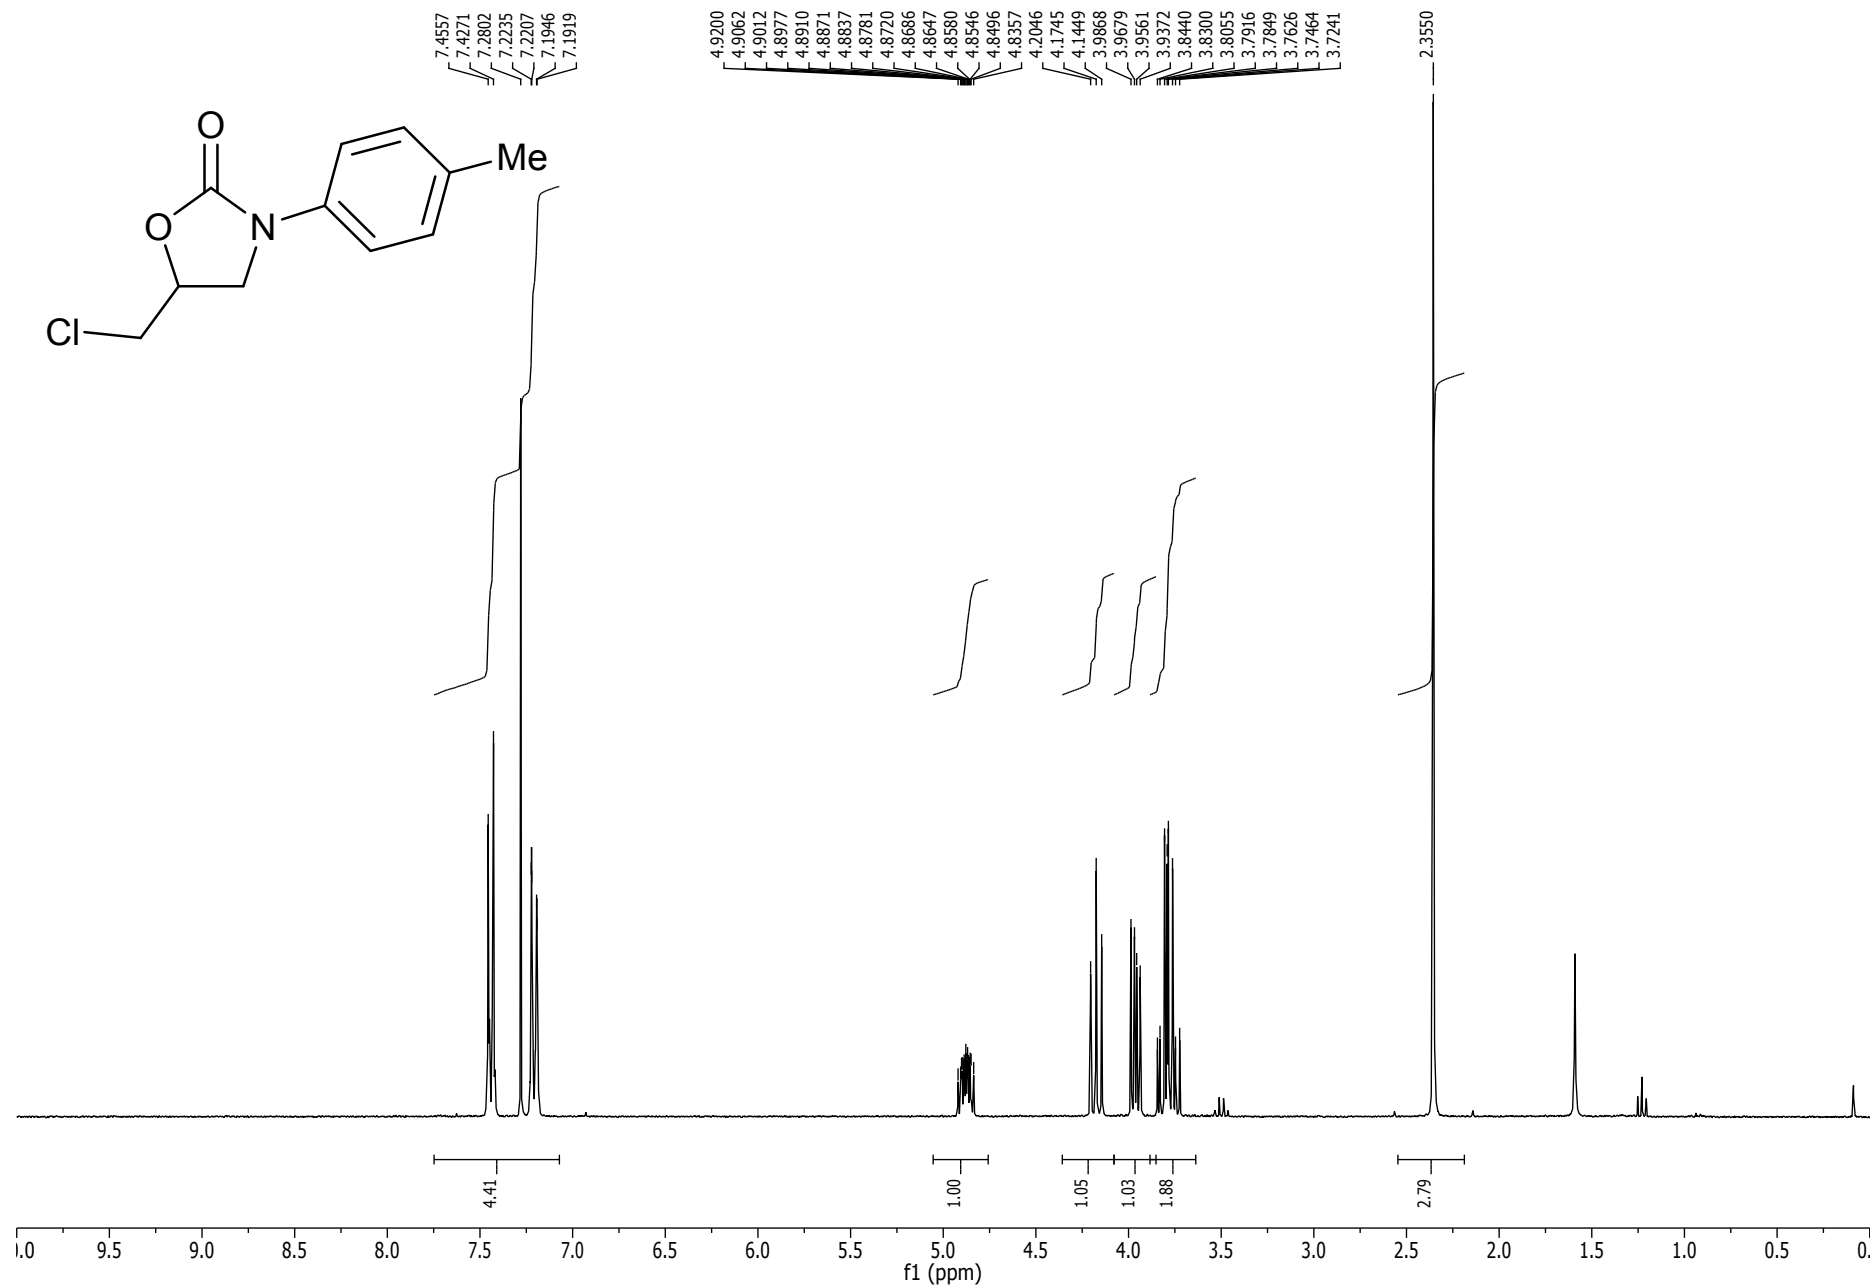

Supplement: c4ra04427d1.pdf [file c4ra04427d1.pdf]
